# Supplementary material for: The accuracy of lung auscultation in the practice of physicians and medical students
Source: PubMed Central journal article supplement (PMC6690530; doi:10.1371/journal.pone.0220606), 2019-08-12
Supplement: pone.0220606.s002.pdf [file pone.0220606.s002.pdf]

## Survey: Dźwięki układu oddechowego

Proszę wpisać adres e-mail. Na wpisany adres zostaną przesłane wyniki ankiety i Państwa odpowiedzi. Pole nie jest obowiązkowe.

Adres e-mail :

\* Proszę wybrać rozpoczętą lub posiadaną specjalizację.

- specjalista pediatrii
- w trakcie specjalizacji z pediatrii
- specjalista neonatologii
- w trakcie specjalizacji z neonatologii
- specjalista pulmonologii
- w trakcie specjalizacji z pulmonologii
- specjalista chorób wewnętrznych
- w trakcie specjalizacji z chorób wewnętrznych
- specjalista medycyny rodzinnej
- w trakcie specjalizacji z medycyny rodzinnej
- specjalista kardiologii
- w trakcie specjalizacji z kardiologii
- specjalista anestezjologii i intensywnej terapii
- w trakcie specjalizacji z anestezjologii i intensywnej terapii
- student medycyny (proszę wpisać w polu "inna" rok studiów)
- inna (proszę wpisać)

\* Rok ukończenia studiów medycznych (w przypadku studentów planowany rok ukończenia studiów)

\* Ukończona uczelnia (w przypadku studentów uczelnia na której aktualnie studiuje)

- Collegium Medicum Uniwersytetu Jagiellońskiego
- Warszawski Uniwersytet Medyczny
- Gdański Uniwersytet Medyczny
- Uniwersytet Medyczny im. Karola Marcinkowskiego w Poznaniu
- Uniwersytet Medyczny im. Piastów Śląskich we Wrocławiu

- Uniwersytet Medyczny w Łodzi
- Uniwersytet Medyczny w Białymstoku
- Uniwersytet Medyczny w Lublinie
- Pomorski Uniwersytet Medyczny w Szczecinie
- Śląski Uniwersytet Medyczny w Katowicach
- Collegium Medicum UMK im. Ludwika Rydygiera w Bydgoszczy
- inna (proszę wpisać)

**W skali od 0-5 (gdzie 0 oznacza bardzo słabo a 5 bardzo dobrze) jak ocenia Pan/Pani swoje umiejętności związane z osłuchiwaniem układu oddechowego**

|                       | 0                     | 1                     | 2                     | 3                     | 4                     | 5                     |
|-----------------------|-----------------------|-----------------------|-----------------------|-----------------------|-----------------------|-----------------------|
| * dziecka             | <input type="radio"/> | <input type="radio"/> | <input type="radio"/> | <input type="radio"/> | <input type="radio"/> | <input type="radio"/> |
| * dorosłego człowieka | <input type="radio"/> | <input type="radio"/> | <input type="radio"/> | <input type="radio"/> | <input type="radio"/> | <input type="radio"/> |

**Proszę o zaznaczenie w jakim stopniu zgadza się Pan/Pani z poniższymi stwierdzeniami**

|                                                                                                                                                   | zdecydowanie nie<br>zgadzam się | nie zgadzam się       | częściowo<br>zgadzam się | zgadzam się           | zdecydowanie<br>zgadzam się |
|---------------------------------------------------------------------------------------------------------------------------------------------------|---------------------------------|-----------------------|--------------------------|-----------------------|-----------------------------|
| * Liczba godzin w trakcie studiów poświęcona na naukę osłuchiwania układu oddechowego jest dla mnie NIEWYSTARCZAJĄCA                              | <input type="radio"/>           | <input type="radio"/> | <input type="radio"/>    | <input type="radio"/> | <input type="radio"/>       |
| * Liczba godzin przeznaczona na szkolenia w zakresie osłuchiwania układu oddechowego podczas stażu i specjalizacji jest dla mnie NIEWYSTARCZAJĄCA | <input type="radio"/>           | <input type="radio"/> | <input type="radio"/>    | <input type="radio"/> | <input type="radio"/>       |
| * Dodatkowe szkolenia w zakresie osłuchiwania układu oddechowego są dla lekarzy mojej specjalności potrzebne                                      | <input type="radio"/>           | <input type="radio"/> | <input type="radio"/>    | <input type="radio"/> | <input type="radio"/>       |
| * Nazewnictwo związane z dźwiękami osłuchowymi dla układu oddechowego jest niespójne i potrzebuje uporządkowania                                  | <input type="radio"/>           | <input type="radio"/> | <input type="radio"/>    | <input type="radio"/> | <input type="radio"/>       |

**Jak często w swojej praktyce (lub zajęć klinicznych) osłuchuje Pan/Pani za pomocą stetoskopu**

|                 | codziennie            | kilka razy w<br>tygodniu | przynajmniej raz<br>w tygodniu | przynajmniej raz<br>w miesiącu | rzadziej niż raz w<br>miesiącu | nie osłuchuję<br>pacjentów |
|-----------------|-----------------------|--------------------------|--------------------------------|--------------------------------|--------------------------------|----------------------------|
| * dzieci        | <input type="radio"/> | <input type="radio"/>    | <input type="radio"/>          | <input type="radio"/>          | <input type="radio"/>          | <input type="radio"/>      |
| * osoby dorosłe | <input type="radio"/> | <input type="radio"/>    | <input type="radio"/>          | <input type="radio"/>          | <input type="radio"/>          | <input type="radio"/>      |

**\* Czy posiada Pan/Pani wykształcenie muzyczne?**

- nie
- szkoła podstawowa muzyczna

- średnia szkoła muzyczna
- śpiew w chórze
- inne (wpisz jakie)

**\* Czy w swojej praktyce używa Pan/Pani elektronicznego stetoskopu?**

- tak
- nie

**\* Podczas osłuchiwania płuc używa Pan/Pani**

- membrany stetoskopu
- lejka stetoskopu
- inne (wpisz jakie)

**Patrząc na rysunek umieszczony poniżej zaznacz numery punktów w których standardowo osłuchujesz układ oddechowy**

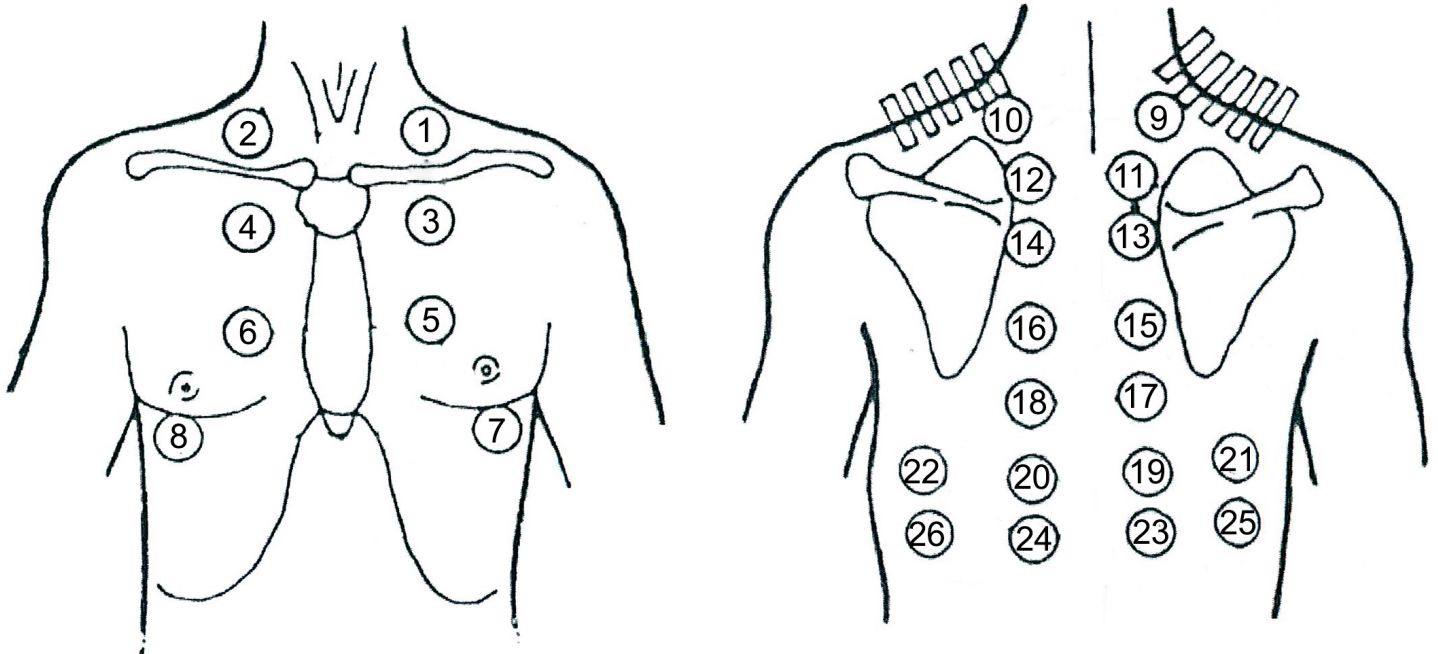

|                      | 1                        | 2                        | 3                        | 4                        | 5                        | 6                        | 7                        | 8                        | 9                        | 10                       | 11                       | 12                       | 13                       | 14                       | 15                       | 16                       | 17                       | 18                       | 19                       | 20                       | 21                       | 22                       | 23                       | 24                       | 25                       | 26                       |
|----------------------|--------------------------|--------------------------|--------------------------|--------------------------|--------------------------|--------------------------|--------------------------|--------------------------|--------------------------|--------------------------|--------------------------|--------------------------|--------------------------|--------------------------|--------------------------|--------------------------|--------------------------|--------------------------|--------------------------|--------------------------|--------------------------|--------------------------|--------------------------|--------------------------|--------------------------|--------------------------|
| * dziecka            | <input type="checkbox"/> | <input type="checkbox"/> | <input type="checkbox"/> | <input type="checkbox"/> | <input type="checkbox"/> | <input type="checkbox"/> | <input type="checkbox"/> | <input type="checkbox"/> | <input type="checkbox"/> | <input type="checkbox"/> | <input type="checkbox"/> | <input type="checkbox"/> | <input type="checkbox"/> | <input type="checkbox"/> | <input type="checkbox"/> | <input type="checkbox"/> | <input type="checkbox"/> | <input type="checkbox"/> | <input type="checkbox"/> | <input type="checkbox"/> | <input type="checkbox"/> | <input type="checkbox"/> | <input type="checkbox"/> | <input type="checkbox"/> | <input type="checkbox"/> | <input type="checkbox"/> |
| * dorosłego pacjenta | <input type="checkbox"/> | <input type="checkbox"/> | <input type="checkbox"/> | <input type="checkbox"/> | <input type="checkbox"/> | <input type="checkbox"/> | <input type="checkbox"/> | <input type="checkbox"/> | <input type="checkbox"/> | <input type="checkbox"/> | <input type="checkbox"/> | <input type="checkbox"/> | <input type="checkbox"/> | <input type="checkbox"/> | <input type="checkbox"/> | <input type="checkbox"/> | <input type="checkbox"/> | <input type="checkbox"/> | <input type="checkbox"/> | <input type="checkbox"/> | <input type="checkbox"/> | <input type="checkbox"/> | <input type="checkbox"/> | <input type="checkbox"/> | <input type="checkbox"/> | <input type="checkbox"/> |

**Badania osłuchowe układu oddechowego - część praktyczna**

**W tej części przedstawione zostaną Panu/Pani nagrania osłuchowe dla kolejnych 24 pacjentów. Bardzo ważne jest używanie w trakcie odsłuchu słuchawek (najlepiej wysokiej jakości)**

Na ilustracji zaznaczony jest punkt, w którym został przyłożony stetoskop i zarejestrowany dźwięk. Poniżej znajduje się nagranie, które należy odsłuchać. Podczas odsłuchiwania można w miarę potrzeb regulować głośność dźwięku. Dźwięk można odtwarzać wielokrotnie.

Proszę o sklasyfikowanie każdego dźwięku poprzez wybór z listy (może to być wybór wielu cech jednocześnie).

\*

## Pacjent 1

Wiek: 11 lat

Wzrost: 147 cm

Waga: 32 kg

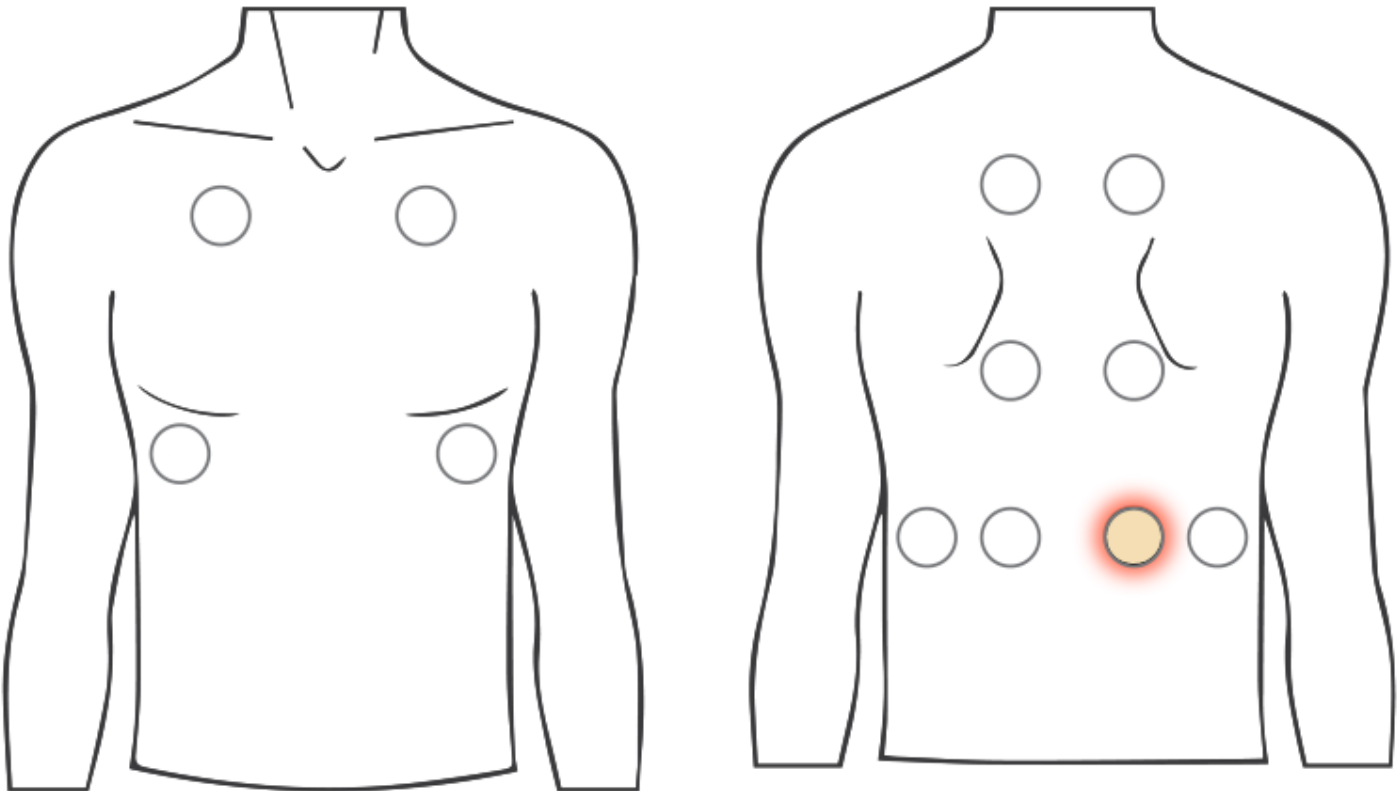

- Szmer pęcherzykowy prawidłowy
- Szmer pęcherzykowy ściszony
- Szmer pęcherzykowy zaostrowany
- Szmer oskrzelowy prawidłowy
- Szmer oskrzelowy patologiczny (w nieprawidłowym miejscu)
- Rzężenia drobnobańkowe
- Rzężenia średniobańkowe

- Rzężenia grubobańkowe
- Trzeszczenia
- Świsty wdechowe
- Świsty wydechowe
- Stridor
- Wydłużenie fazy wydechowej
- Skrzeczenia
- Tarcie opłucnowe
- Furczenia
- Uwagi

\*

## Pacjent 2

Wiek: 3 lat

Wzrost: 96 cm

Waga: 12 kg

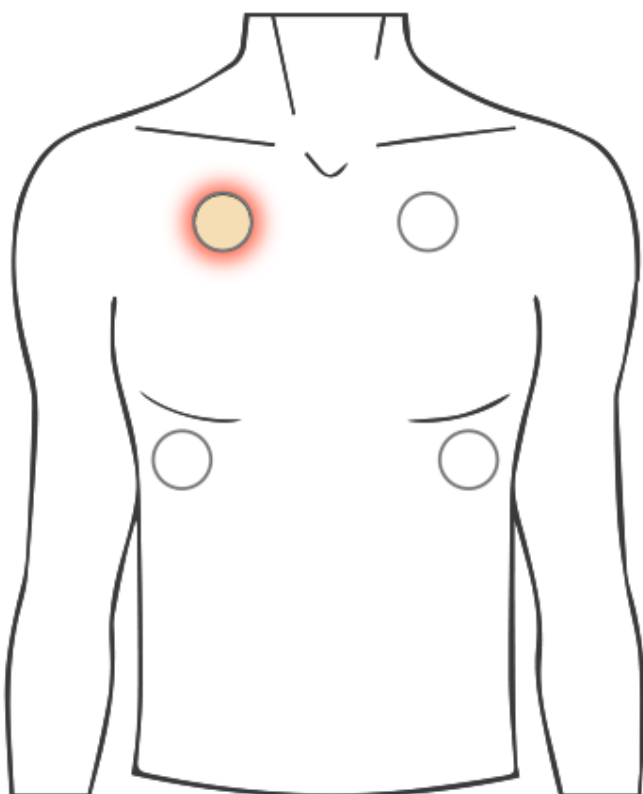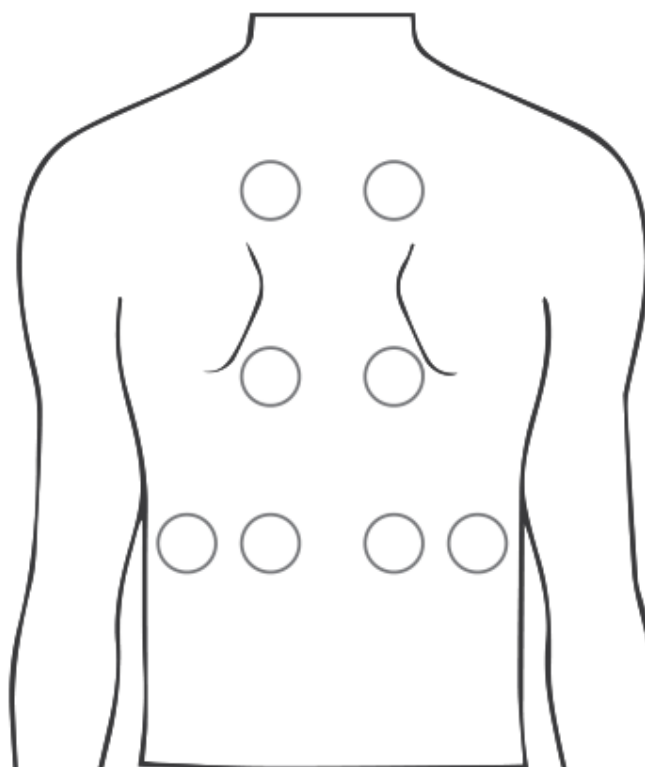

- Szmer pęcherzykowy prawidłowy
- Szmer pęcherzykowy ściszony

- Szmer pęcherzykowy zaostrowy
- Szmer oskrzelowy prawidłowy
- Szmer oskrzelowy patologiczny (w nieprawidłowym miejscu)
- Rzężenia drobnobańkowe
- Rzężenia średniobańkowe
- Rzężenia grubobańkowe
- Trzeszczenia
- Świsty wdechowe
- Świsty wydechowe
- Stridor
- Wydłużenie fazy wydechowej
- Skrzeczenia
- Tarcie opłucnowe
- Furczenia
- Uwagi

\*

### Pacjent 3

**Wiek: 6 lat**

**Wzrost: 118 cm**

**Waga: 30 kg**

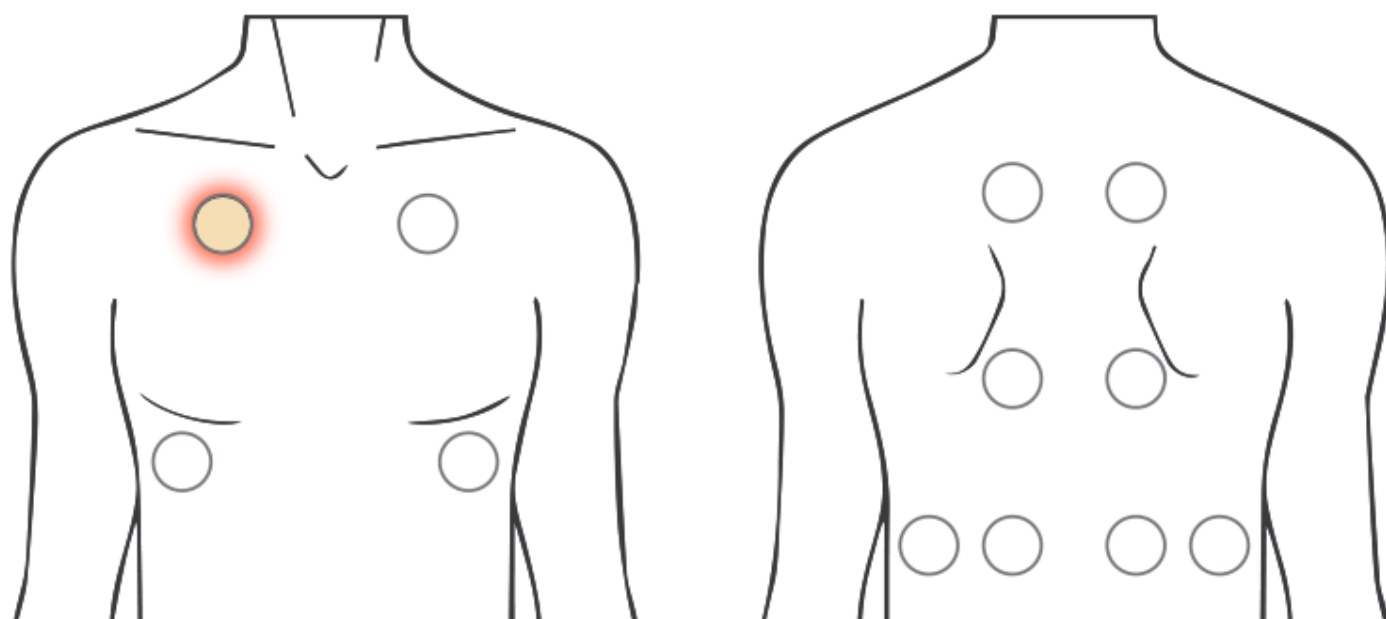

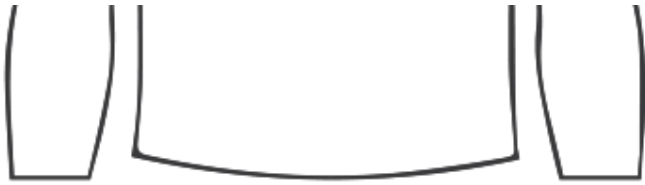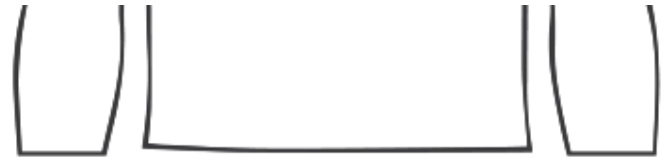

- Szmer pęcherzykowy prawidłowy
- Szmer pęcherzykowy ściszony
- Szmer pęcherzykowy zaostyczny
- Szmer oskrzelowy prawidłowy
- Szmer oskrzelowy patologiczny (w nieprawidłowym miejscu)
- Rzężenia drobnobańkowe
- Rzężenia średniobańkowe
- Rzężenia grubobańkowe
- Trzeszczenia
- Świsty wdechowe
- Świsty wydechowe
- Stridor
- Wydłużenie fazy wydechowej
- Skrzeczenia
- Tarcie opłucnowe
- Furczenia
- Uwagi

\*

#### Pacjent 4

Wiek: 7 lat

Wzrost: 115 cm

Waga: 21 kg

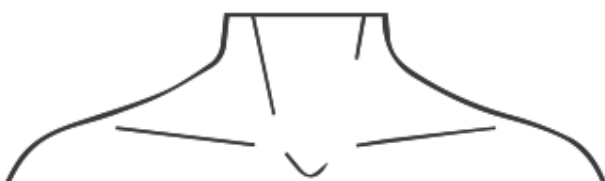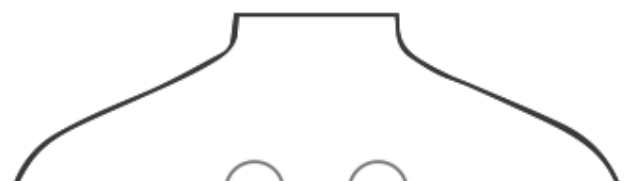

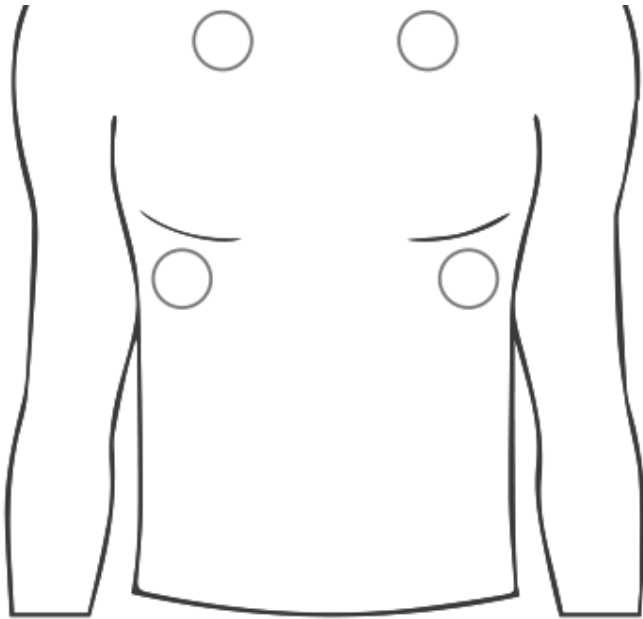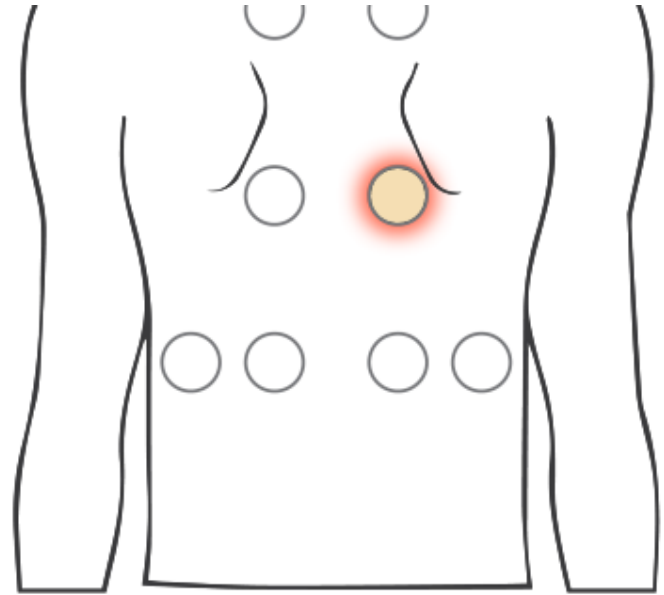

- Szmer pęcherzykowy prawidłowy
- Szmer pęcherzykowy ściszony
- Szmer pęcherzykowy zaostzony
- Szmer oskrzelowy prawidłowy
- Szmer oskrzelowy patologiczny (w nieprawidłowym miejscu)
- Rzężenia drobnobańkowe
- Rzężenia średniobańkowe
- Rzężenia grubobańkowe
- Trzeszczenia
- Świsty wdechowe
- Świsty wydechowe
- Stridor
- Wydłużenie fazy wydechowej
- Skrzeczenia
- Tarcie opłucnowe
- Furczenia
- Uwagi

\*

**Pacjent 5**

**Wiek: 18 lat**



**Wzrost: 168 cm**

**Waga: 50 kg**

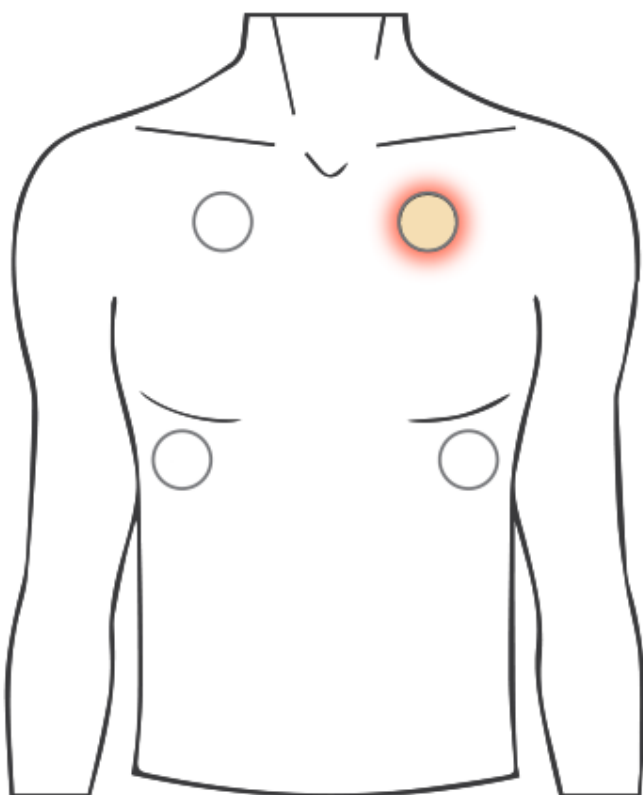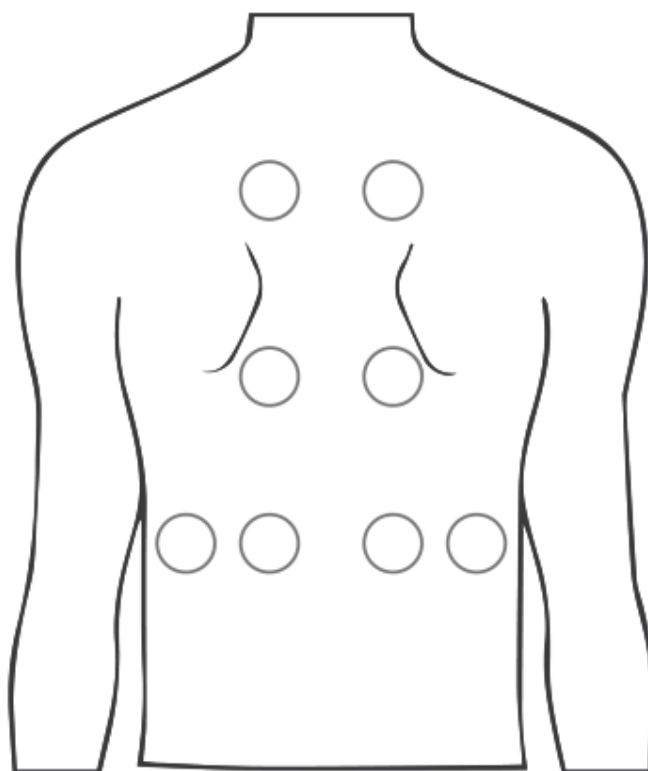

- Szmer pęcherzykowy prawidłowy
- Szmer pęcherzykowy ściszony
- Szmer pęcherzykowy zaostzony
- Szmer oskrzelowy prawidłowy
- Szmer oskrzelowy patologiczny (w nieprawidłowym miejscu)
- Rzężenia drobnobańkowe
- Rzężenia średniobańkowe
- Rzężenia grubobańkowe
- Trzeszczenia
- Świsty wdechowe
- Świsty wydechowe
- Stridor
- Wydłużenie fazy wydechowej
- Skrzeczenia
- Tarcie opłucnowe
- Furczenia
- Uwagi

\*

### Pacjent 6

Wiek: 5 miesięcy

Wzrost: 78 cm

Waga: 7 kg

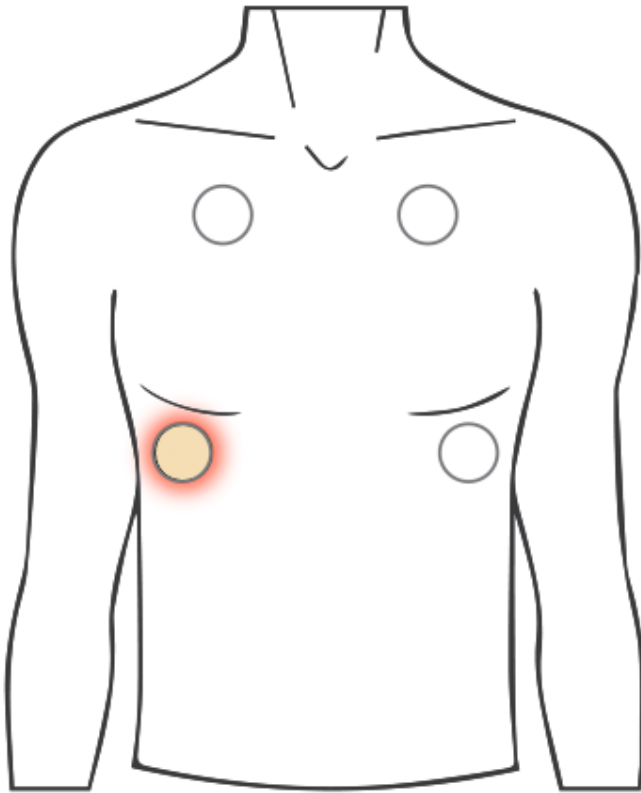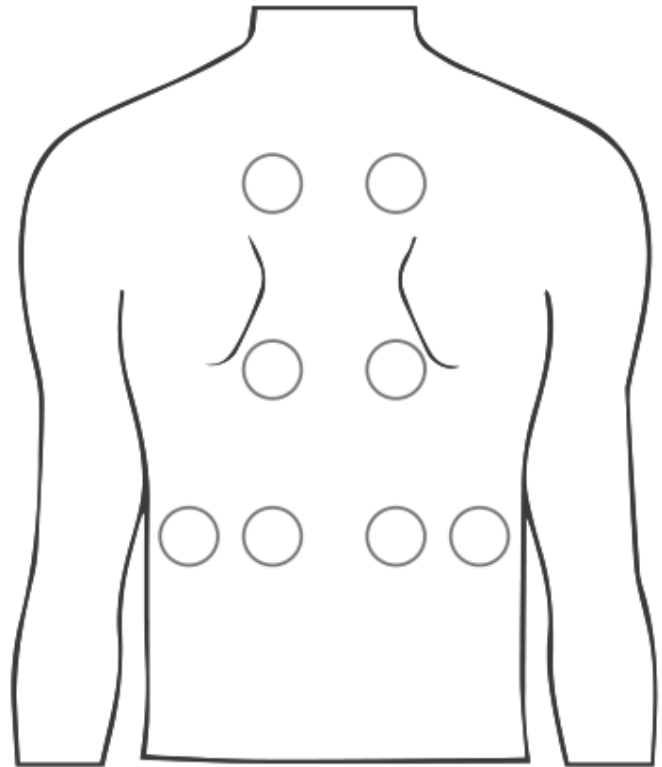

- Szmer pęcherzykowy prawidłowy
- Szmer pęcherzykowy ściszony
- Szmer pęcherzykowy zaostrowany
- Szmer oskrzelowy prawidłowy
- Szmer oskrzelowy patologiczny (w nieprawidłowym miejscu)
- Rzężenia drobnobańkowe
- Rzężenia średniobańkowe
- Rzężenia grubobańkowe
- Trzeszczenia
- Świsty wdechowe
- Świsty wydechowe
- Stridor

- Wydłużenie fazy wydechowej
- Skrzeczenia
- Tarcie opłucnowe
- Furczenia
- Uwagi

\*

## Pacjent 7

Wiek: 2 lata

Wzrost: 81 cm

Waga: 10 kg

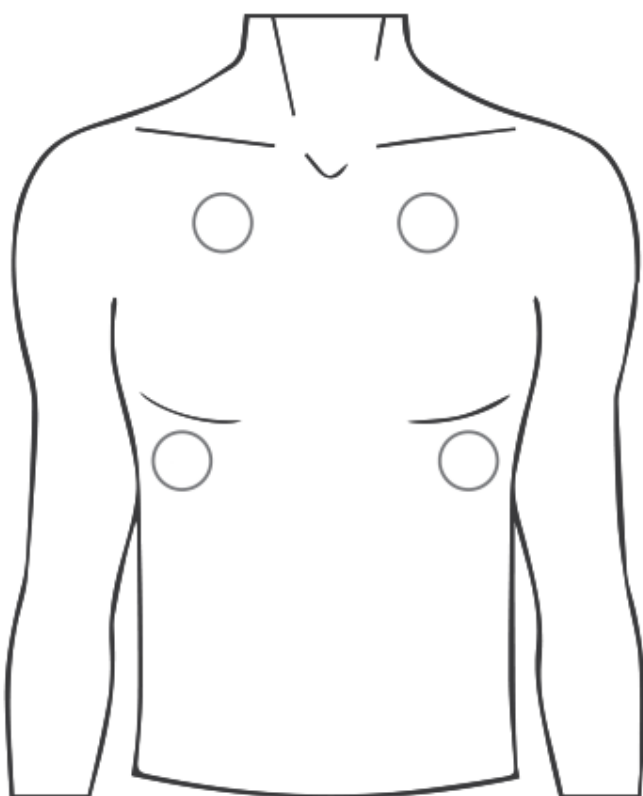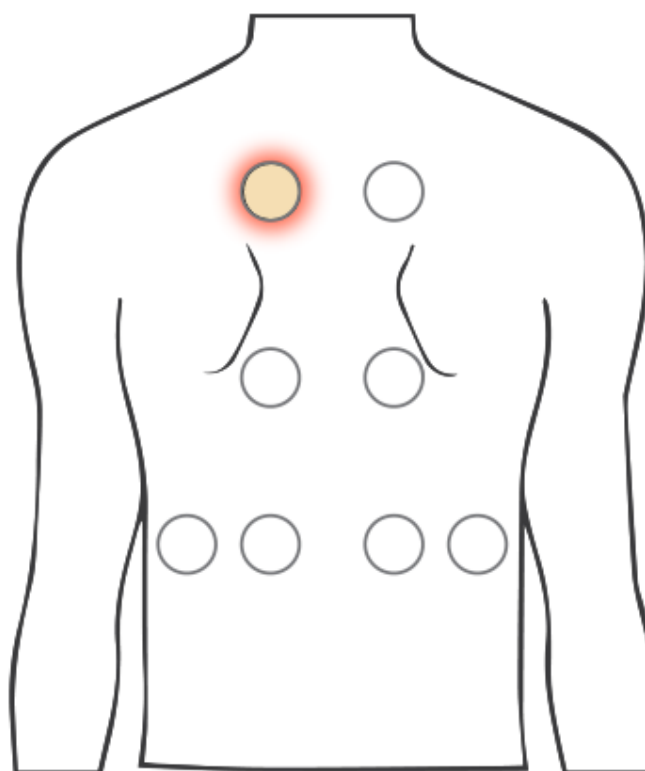

- Szmer pęcherzykowy prawidłowy
- Szmer pęcherzykowy ściszony
- Szmer pęcherzykowy zaostrowany
- Szmer oskrzelowy prawidłowy
- Szmer oskrzelowy patologiczny (w nieprawidłowym miejscu)
- Rzężenia drobnobańkowe
- Rzężenia średniobańkowe
- Rzężenia grubobańkowe

- Trzeszczenia
- Świsty wdechowe
- Świsty wydechowe
- Stridor
- Wydłużenie fazy wydechowej
- Skrzeczenia
- Tarcie opłucnowe
- Furczenia
- Uwagi

\*

## Pacjent 8

**Wiek: 18 lat**

**Wzrost: 179 cm**

**Waga: 60 kg**

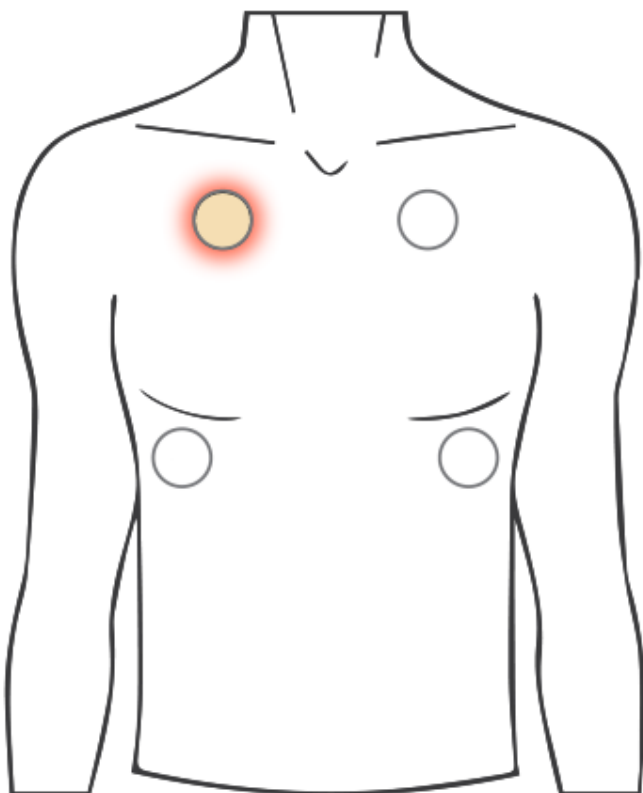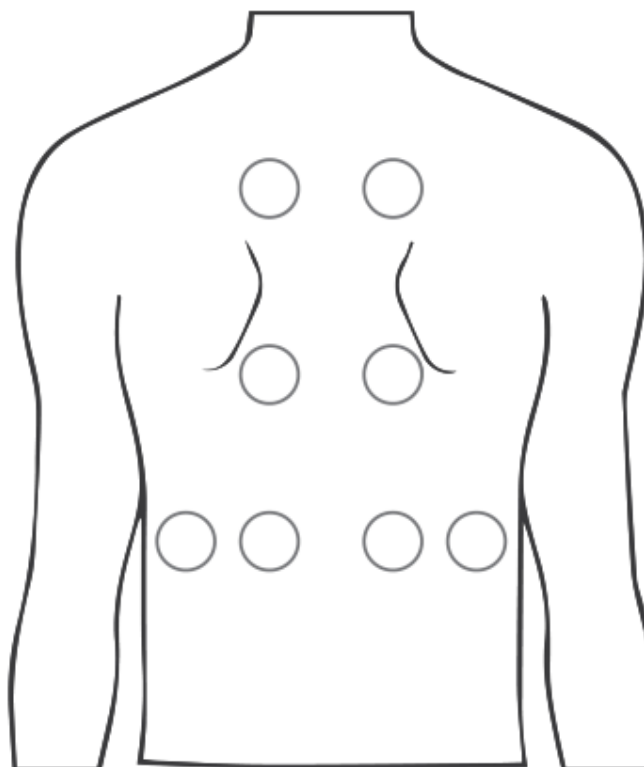

- Szmer pęcherzykowy prawidłowy
- Szmer pęcherzykowy ściszony
- Szmer pęcherzykowy zaostrowany
- Szmer oskrzelowy prawidłowy
- Szmer oskrzelowy patologiczny (w nieprawidłowym miejscu)
- Rzężenia drobnobańkowe
- Rzężenia średniobańkowe
- Rzężenia grubobańkowe
- Trzeszczenia
- Świsty wdechowe
- Świsty wydechowe
- Stridor
- Wydłużenie fazy wydechowej
- Skrzeczenia
- Tarcie opłucnowe
- Furczenia
- Uwagi

\*

## Pacjent 9

**Wiek: 15 lat**

**Wzrost: 164 cm**

**Waga: 42 kg**

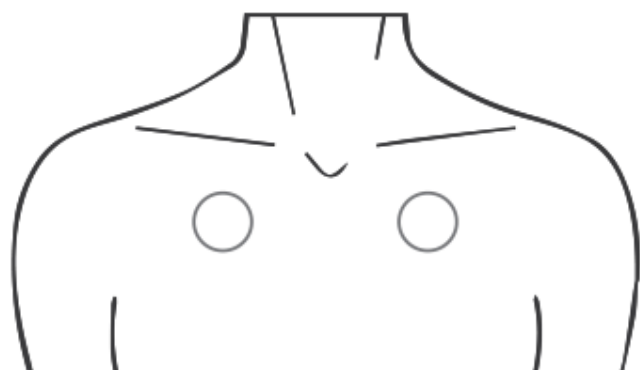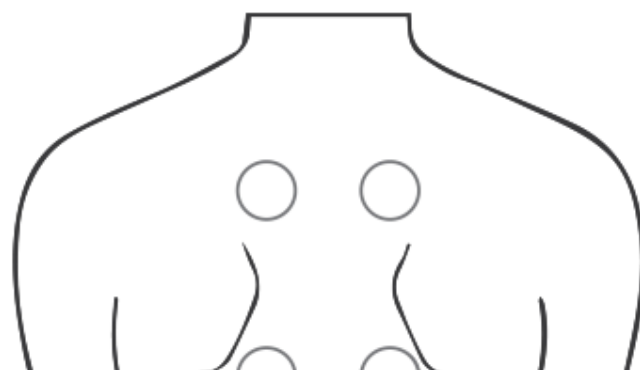

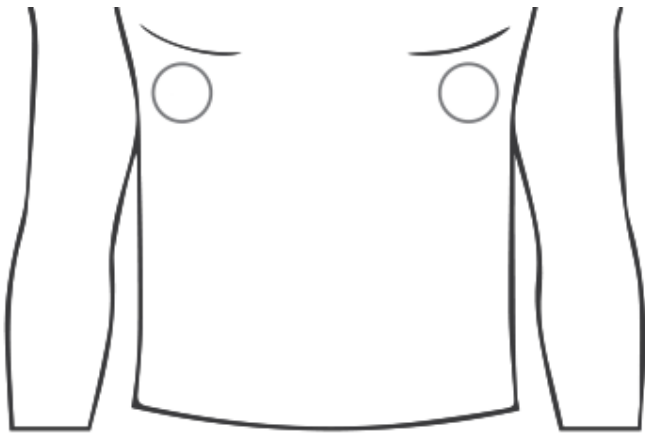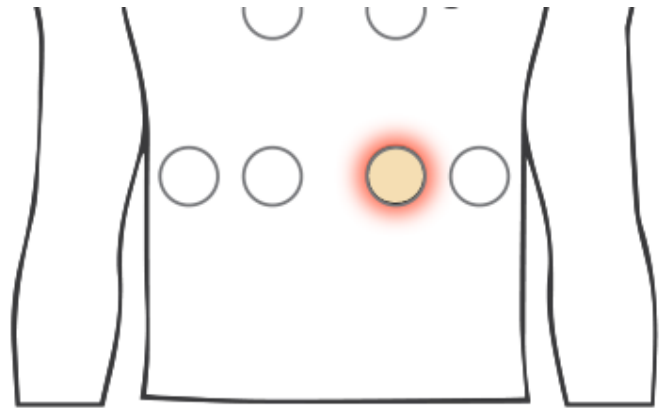

- Szmer pęcherzykowy prawidłowy
- Szmer pęcherzykowy ściszony
- Szmer pęcherzykowy zaostrowany
- Szmer oskrzelowy prawidłowy
- Szmer oskrzelowy patologiczny (w nieprawidłowym miejscu)
- Rzężenia drobnobańkowe
- Rzężenia średniobańkowe
- Rzężenia grubobańkowe
- Trzeszczenia
- Świsty wdechowe
- Świsty wydechowe
- Stridor
- Wydłużenie fazy wydechowej
- Skrzeczenia
- Tarcie opłucnowe
- Furczenia
- Uwagi

\*

## Pacjent 10

Wiek: 3 lata

Dźwięki układu oddechowego

**Wzrost: 92 cm**

**Waga: 14 kg**

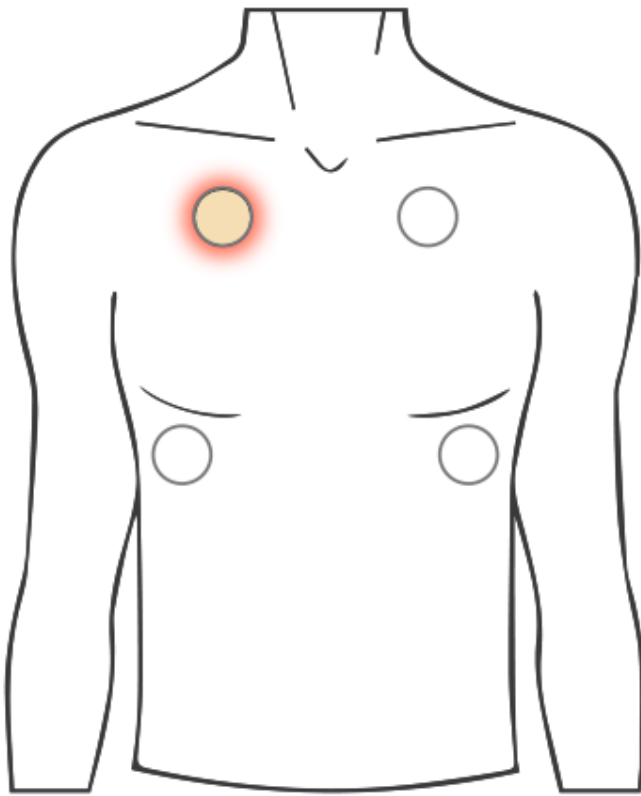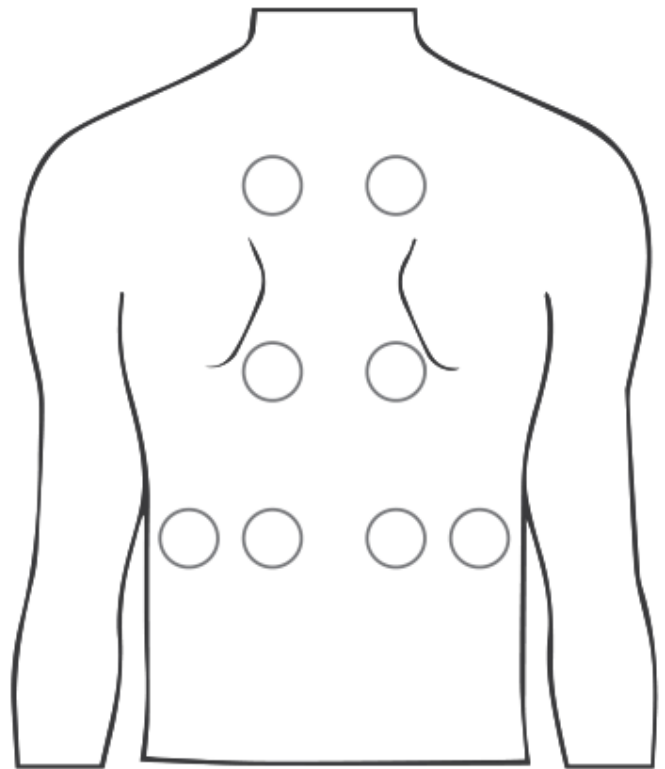

- Szmer pęcherzykowy prawidłowy
- Szmer pęcherzykowy ściszony
- Szmer pęcherzykowy zaostzony
- Szmer oskrzelowy prawidłowy
- Szmer oskrzelowy patologiczny (w nieprawidłowym miejscu)
- Rzężenia drobnobańkowe
- Rzężenia średniobańkowe
- Rzężenia grubobańkowe
- Trzeszczenia
- Świsty wdechowe
- Świsty wydechowe
- Stridor

Wydłużenie fazy wydechowej

Skrzeczenia

Tarcie opłucnowe

Furczenia

Uwagi

\*

## Pacjent 11

**Wiek: 7 miesięcy**

**Wzrost: 82 cm**

**Waga: 8 kg**

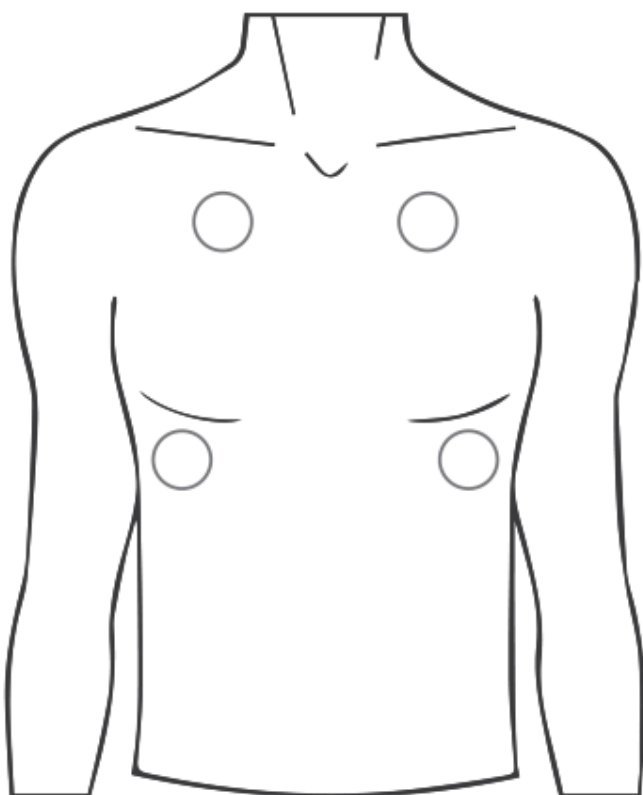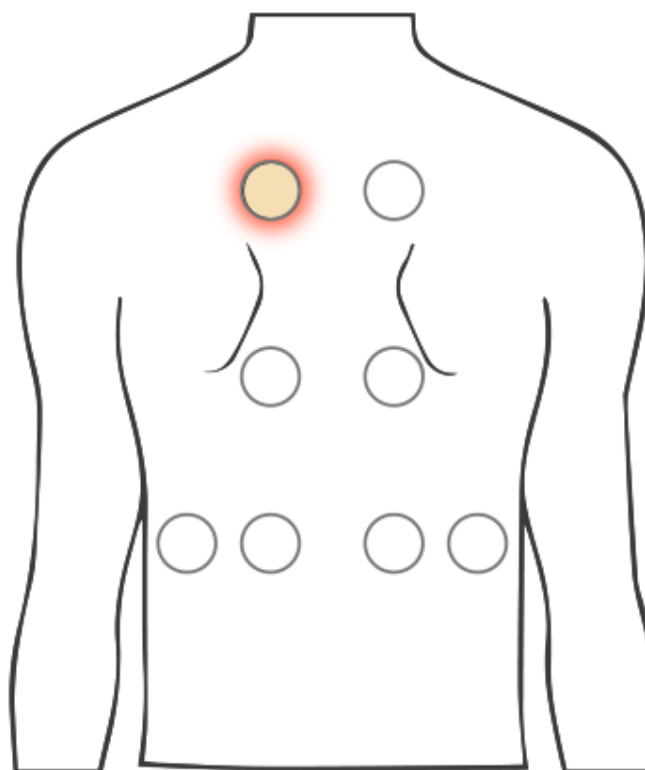

Szmer pęcherzykowy prawidłowy

Szmer pęcherzykowy ściszony

Szmer pęcherzykowy zaostrowany



- Szmer oskrzelowy prawidłowy
- Szmer oskrzelowy patologiczny (w nieprawidłowym miejscu)
- Rzężenia drobnobańkowe
- Rzężenia średniobańkowe
- Rzężenia grubobańkowe
- Trzeszczenia
- Świsty wdechowe
- Świsty wydechowe
- Stridor
- Wydłużenie fazy wydechowej
- Skrzeczenia
- Tarcie opłucnowe
- Furczenia
- Uwagi

\*

## Pacjent 12

Wiek: 17 lat

Wzrost: 150 cm

Waga: 50 kg

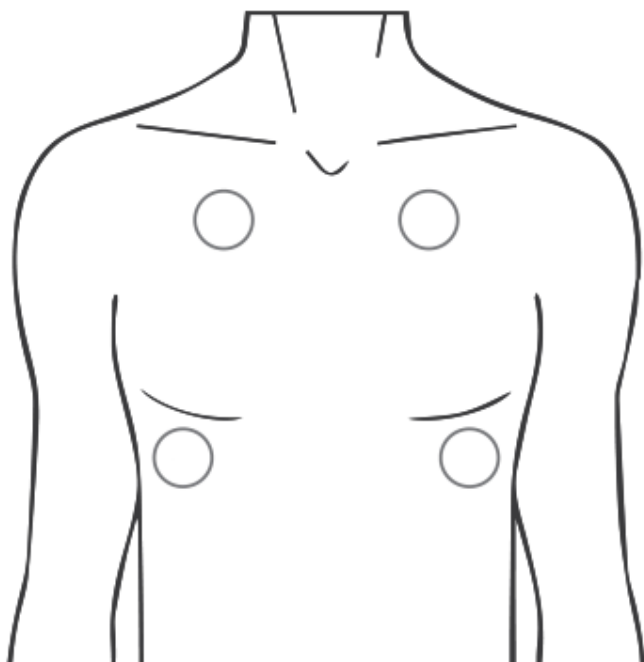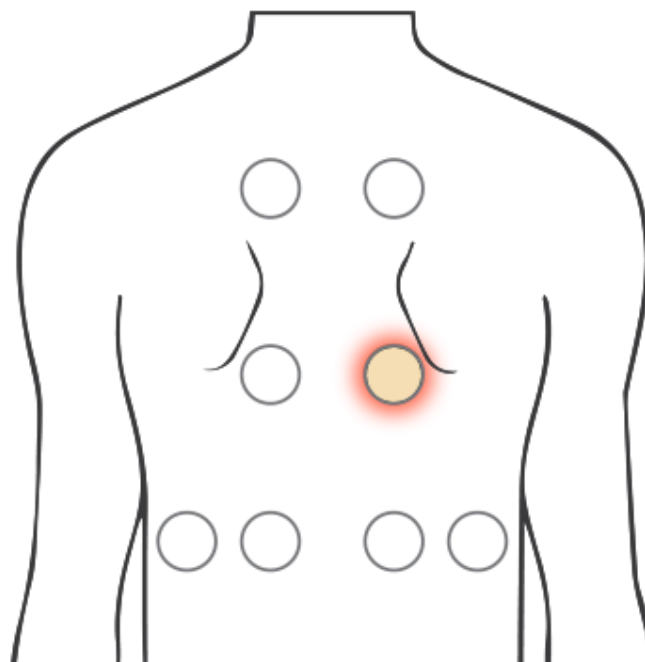

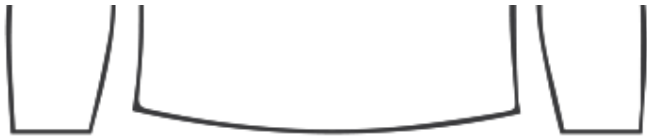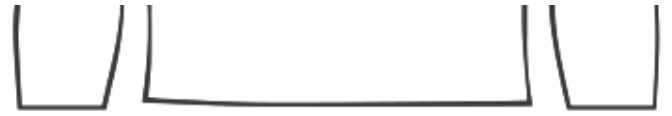

- Szmer pęcherzykowy prawidłowy
- Szmer pęcherzykowy ściszony
- Szmer pęcherzykowy zaostrowy
- Szmer oskrzelowy prawidłowy
- Szmer oskrzelowy patologiczny (w nieprawidłowym miejscu)
- Rzężenia drobnobańkowe
- Rzężenia średniobańkowe
- Rzężenia grubobańkowe
- Trzeszczenia
- Świsty wdechowe
- Świsty wydechowe
- Stridor
- Wydłużenie fazy wydechowej
- Skrzeczenia
- Tarcie opłucnowe
- Furczenia
- Uwagi

\*

## Pacjent 13

**Wiek: 13 lat**

**Wzrost: 148 cm**

**Waga: 33 kg**

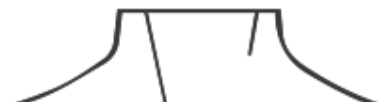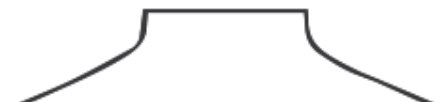

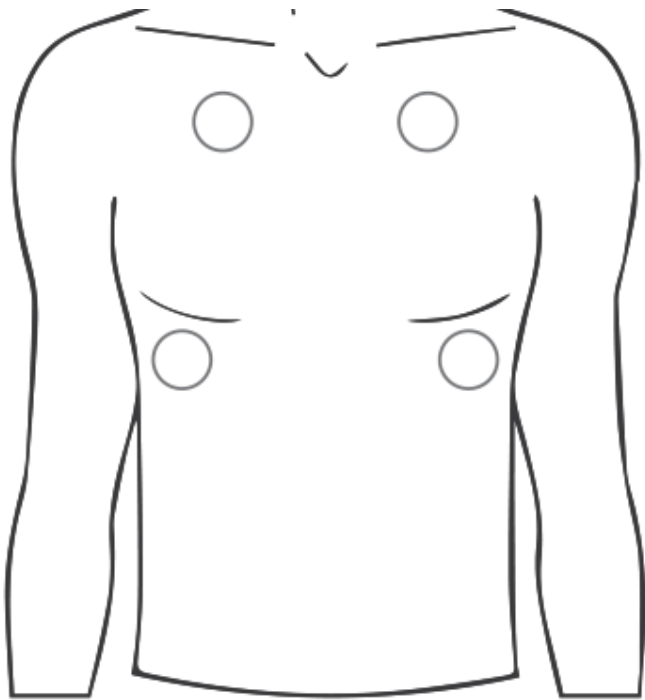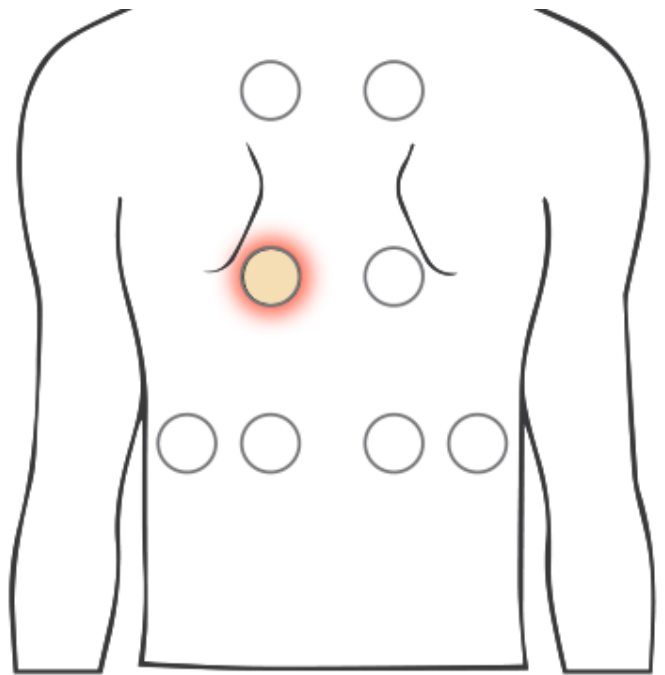

- Szmer pęcherzykowy prawidłowy
- Szmer pęcherzykowy ściszony
- Szmer pęcherzykowy zaostzony
- Szmer oskrzelowy prawidłowy
- Szmer oskrzelowy patologiczny (w nieprawidłowym miejscu)
- Rzężenia drobnobańkowe
- Rzężenia średniobańkowe
- Rzężenia grubobańkowe
- Trzeszczenia
- Świsty wdechowe
- Świsty wydechowe
- Stridor
- Wydłużenie fazy wydechowej
- Skrzeczenia
- Tarcie opłucnowe
- Furczenia
- Uwagi

\*

## Pacjent 14

Wiek: 14 lat

Wzrost: 150 cm

Waga: 35 kg

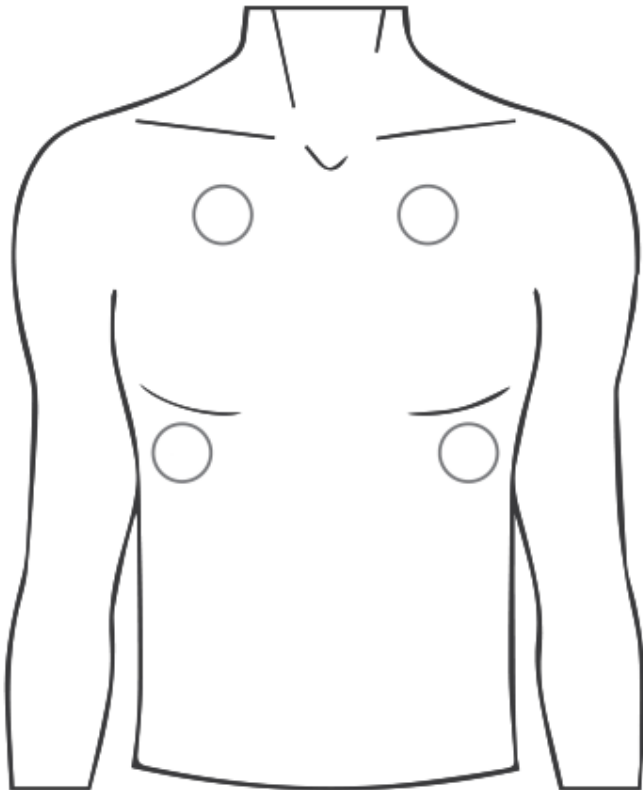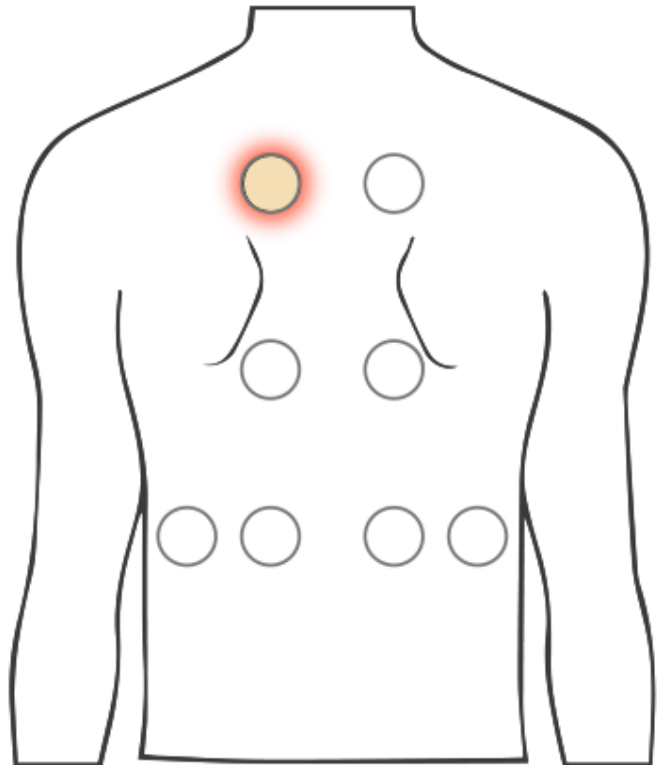

- Szmer pęcherzykowy prawidłowy
- Szmer pęcherzykowy ściszony
- Szmer pęcherzykowy zaostrowy
- Szmer oskrzelowy prawidłowy
- Szmer oskrzelowy patologiczny (w nieprawidłowym miejscu)
- Rzężenia drobnobańkowe
- Rzężenia średniobańkowe
- Rzężenia grubobańkowe

- Trzeszczenia
- Świsty wdechowe
- Świsty wydechowe
- Stridor
- Wydłużenie fazy wydechowej
- Skrzeczenia
- Tarcie opłucnowe
- Furczenia
- Uwagi

\*

## Pacjent 15

**Wiek: 25 lat**

**Wzrost: 176 cm**

**Waga: 58 kg**

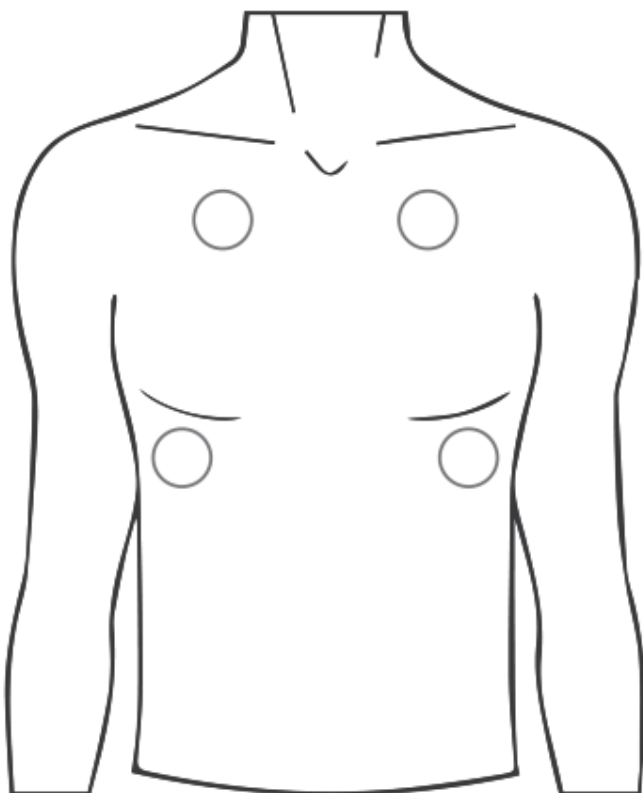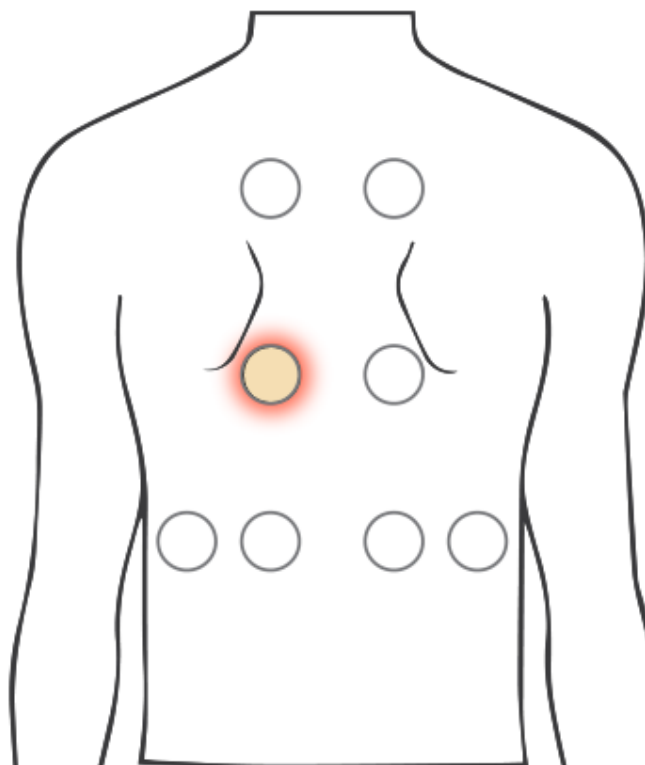

- Szmer pęcherzykowy prawidłowy
- Szmer pęcherzykowy ściszony
- Szmer pęcherzykowy zaostrowany
- Szmer oskrzelowy prawidłowy
- Szmer oskrzelowy patologiczny (w nieprawidłowym miejscu)
- Rzężenia drobnobańkowe
- Rzężenia średniobańkowe
- Rzężenia grubobańkowe
- Trzeszczenia
- Świsty wdechowe
- Świsty wydechowe
- Stridor
- Wydłużenie fazy wydechowej
- Skrzeczenia
- Tarcie opłucnowe
- Furczenia
- Uwagi

\*

## Pacjent 16

**Wiek: 3 lat**

**Wzrost: 94 cm**

**Waga: 14 kg**

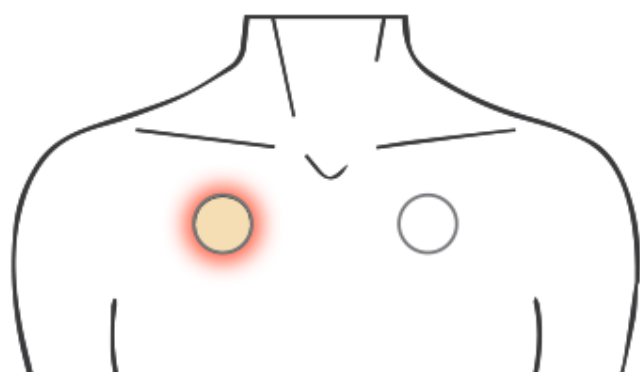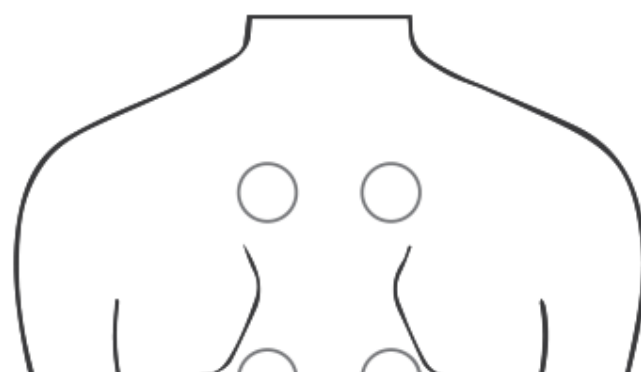

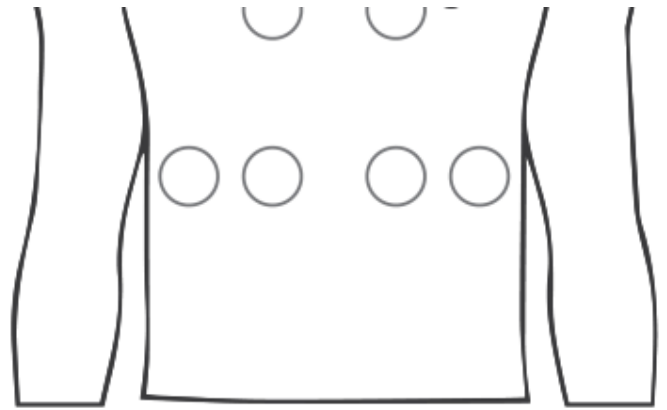

- Szmer pęcherzykowy prawidłowy
- Szmer pęcherzykowy ściszony
- Szmer pęcherzykowy zaostrowany
- Szmer oskrzelowy prawidłowy
- Szmer oskrzelowy patologiczny (w nieprawidłowym miejscu)
- Rzężenia drobnobańkowe
- Rzężenia średniobańkowe
- Rzężenia grubobańkowe
- Trzeszczenia
- Świsty wdechowe
- Świsty wydechowe
- Stridor
- Wydłużenie fazy wydechowej
- Skrzeczenia
- Tarcie opłucnowe
- Furczenia
- Uwagi

\*  
**Pacjent 17**

**Wiek: 17 lat**

Dźwięki układu oddechowego

**Wzrost: 150 cm**

**Waga: 50 kg**

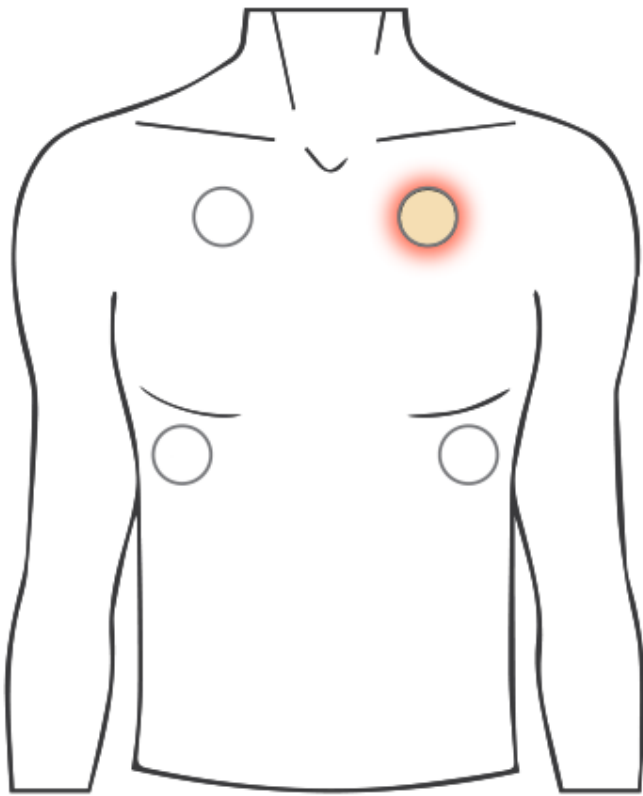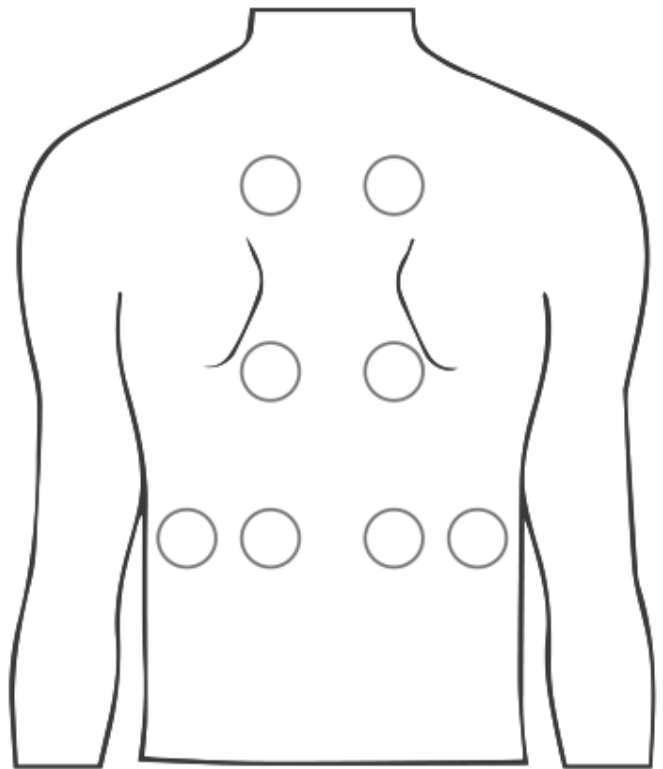

- Szmer pęcherzykowy prawidłowy
- Szmer pęcherzykowy ściszony
- Szmer pęcherzykowy zaostzony
- Szmer oskrzelowy prawidłowy
- Szmer oskrzelowy patologiczny (w nieprawidłowym miejscu)
- Rzężenia drobnobańkowe
- Rzężenia średniobańkowe
- Rzężenia grubobańkowe
- Trzeszczenia
- Świsty wdechowe
- Świsty wydechowe
- Stridor



- Wydłużenie fazy wydechowej
- Skrzeczenia
- Tarcie opłucnowe
- Furczenia
- Uwagi

\*

## Pacjent 18

Wiek: 18 lat

Wzrost: 179 cm

Waga: 60 kg

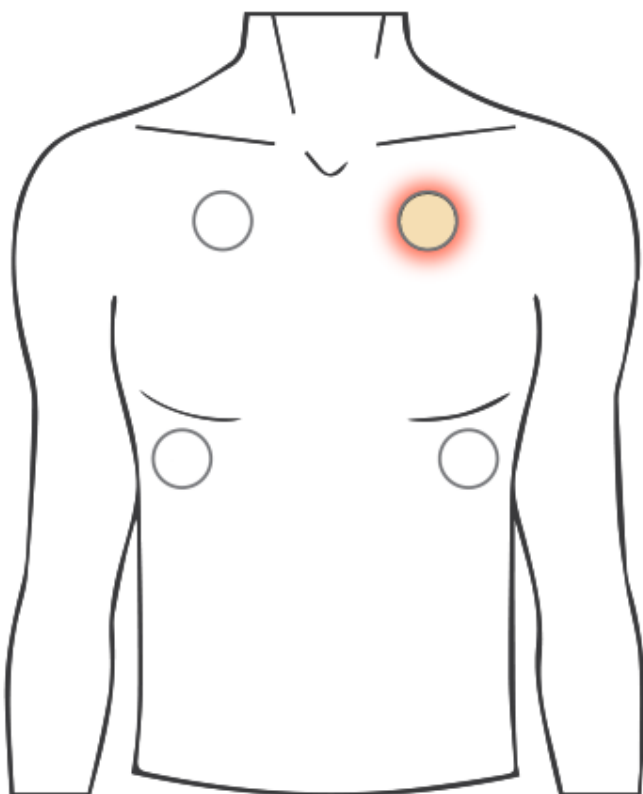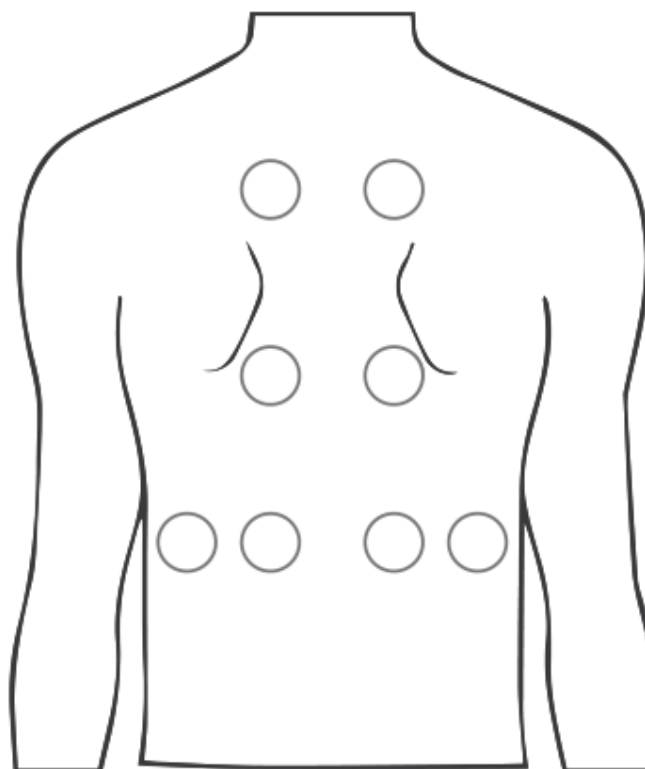

- Szmer pęcherzykowy prawidłowy
- Szmer pęcherzykowy ściszony
- Szmer pęcherzykowy zaostrowany
- Szmer oskrzelowy prawidłowy
- Szmer oskrzelowy patologiczny (w nieprawidłowym miejscu)
- Rzężenia drobnobańkowe
- Rzężenia średniobańkowe
- Rzężenia grubobańkowe

- Trzeszczenia
- Świsty wdechowe
- Świsty wydechowe
- Stridor
- Wydłużenie fazy wydechowej
- Skrzeczenia
- Tarcie opłucnowe
- Furczenia
- Uwagi

\*

### Pacjent 19

Wiek: 2 lata

Wzrost: 84 cm

Waga: 11 kg

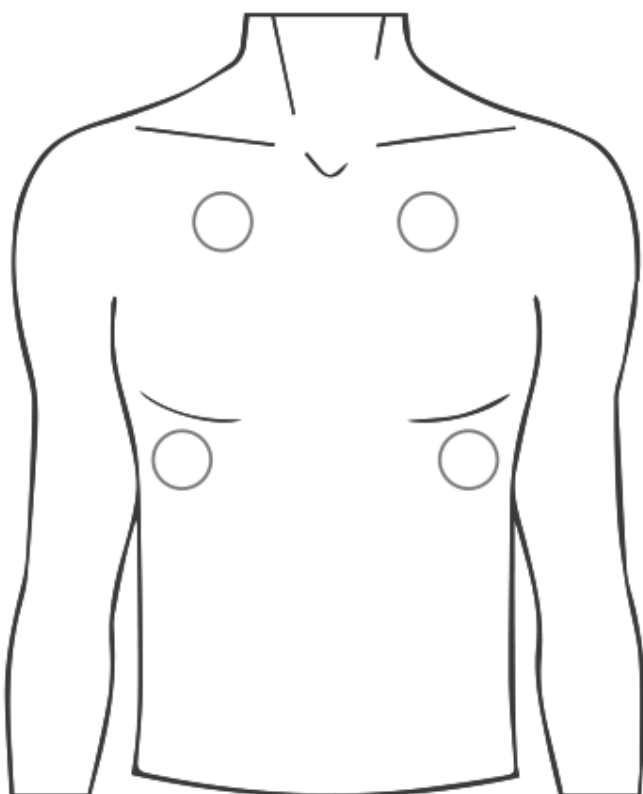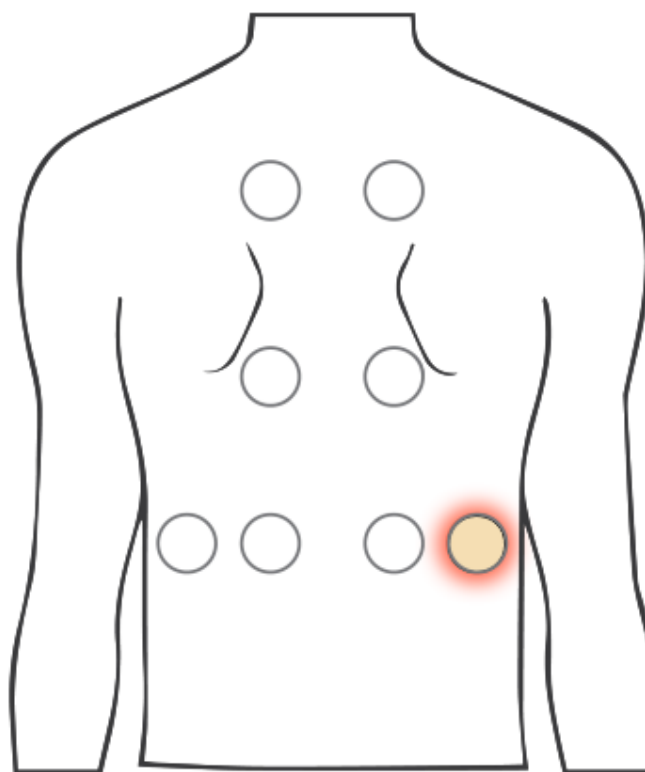

- Szmer pęcherzykowy prawidłowy
- Szmer pęcherzykowy ściszony
- Szmer pęcherzykowy zaostrowy

- Szmer oskrzelowy prawidłowy
- Szmer oskrzelowy patologiczny (w nieprawidłowym miejscu)
- Rzężenia drobnobańkowe
- Rzężenia średniobańkowe
- Rzężenia grubobańkowe
- Trzeszczenia
- Świsty wdechowe
- Świsty wydechowe
- Stridor
- Wydłużenie fazy wydechowej
- Skrzeczenia
- Tarcie opłucnowe
- Furczenia
- Uwagi

\*

### Pacjent 20

Wiek: 6 lat

Wzrost: 118 cm

Waga: 23 kg

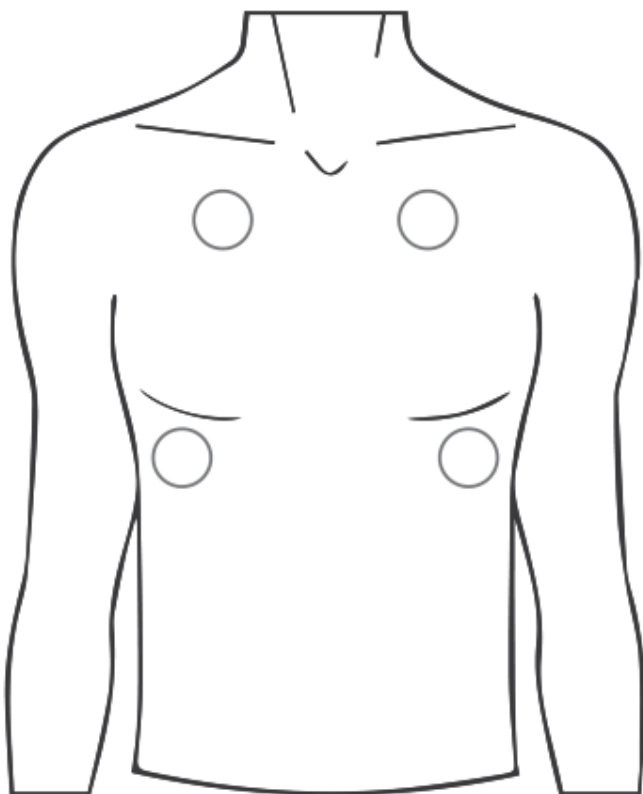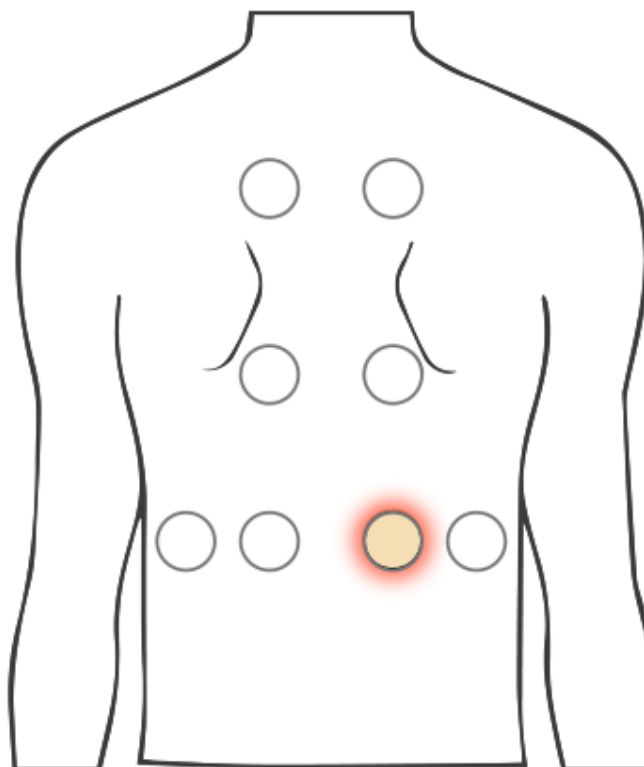

- Szmer pęcherzykowy prawidłowy
- Szmer pęcherzykowy ściszony
- Szmer pęcherzykowy zaostrzony
- Szmer oskrzelowy prawidłowy
- Szmer oskrzelowy patologiczny (w nieprawidłowym miejscu)
- Rzężenia drobnobańkowe
- Rzężenia średniobańkowe
- Rzężenia grubobańkowe
- Trzeszczenia
- Świsty wdechowe
- Świsty wydechowe
- Stridor
- Wydłużenie fazy wydechowej
- Skrzeczenia
- Tarcie opłucnowe
- Furczenia
- Uwagi

\*

### Pacjent 21

**Wiek: 35 lat**

**Wzrost: 180 cm**

**Waga: 74 kg**

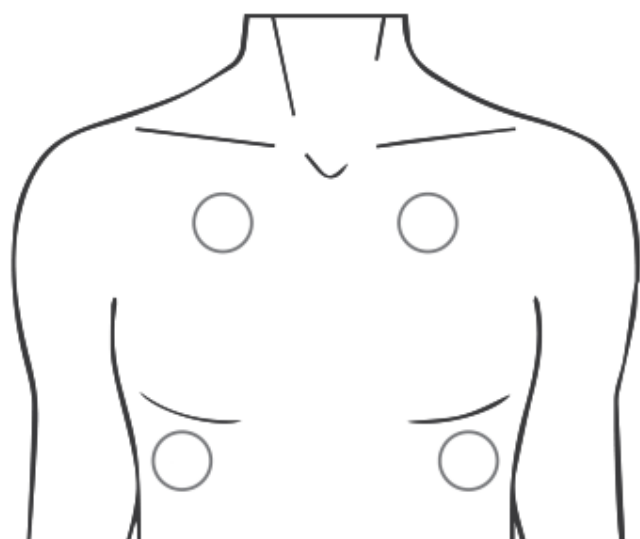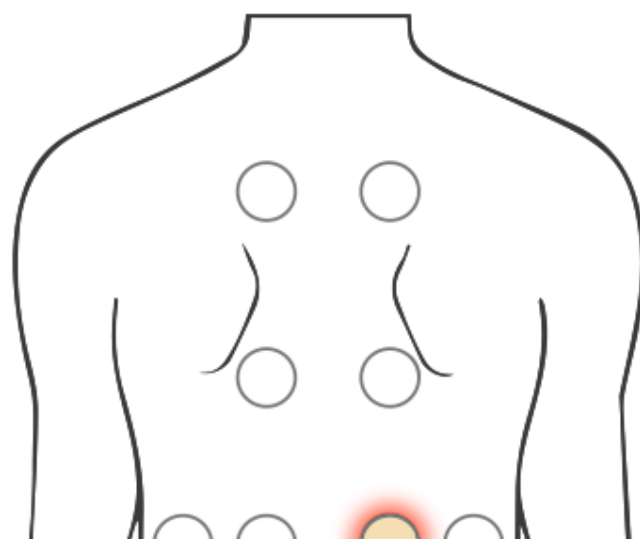

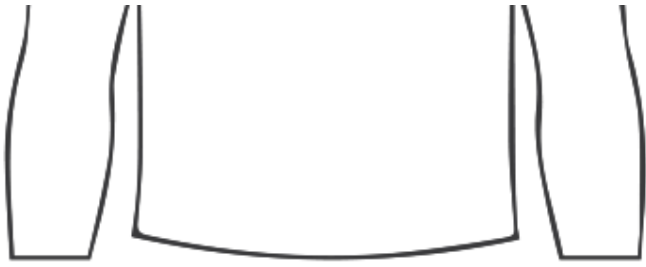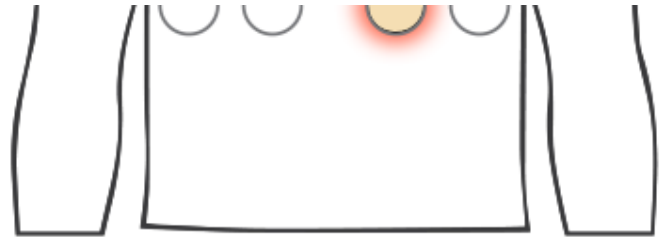

- Szmer pęcherzykowy prawidłowy
- Szmer pęcherzykowy ściszony
- Szmer pęcherzykowy zaostrowy
- Szmer oskrzelowy prawidłowy
- Szmer oskrzelowy patologiczny (w nieprawidłowym miejscu)
- Rzężenia drobnobańkowe
- Rzężenia średniobańkowe
- Rzężenia grubobańkowe
- Trzeszczenia
- Świsty wdechowe
- Świsty wydechowe
- Stridor
- Wydłużenie fazy wydechowej
- Skrzeczenia
- Tarcie opłucnowe
- Furczenia
- Uwagi

\*

## Pacjent 22

Wiek: 56 lat

Wzrost: 162 cm

Waga: 53 kg

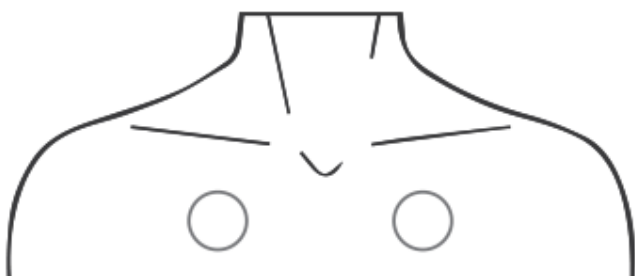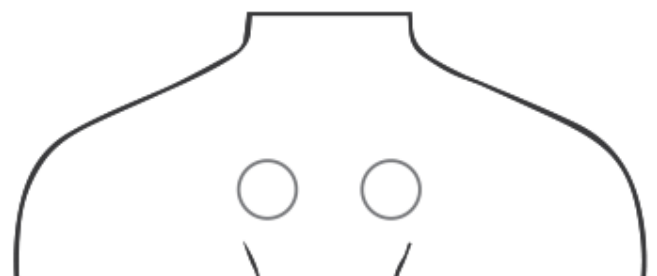

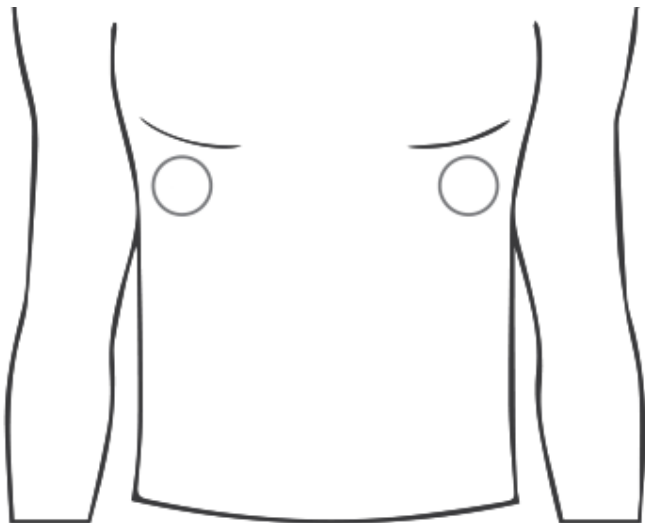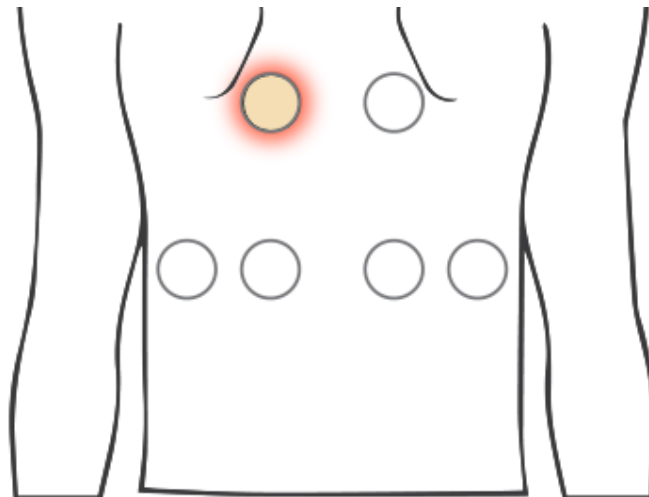

- Szmer pęcherzykowy prawidłowy
- Szmer pęcherzykowy ściszony
- Szmer pęcherzykowy zaostrowany
- Szmer oskrzelowy prawidłowy
- Szmer oskrzelowy patologiczny (w nieprawidłowym miejscu)
- Rzężenia drobnobańkowe
- Rzężenia średniobańkowe
- Rzężenia grubobańkowe
- Trzeszczenia
- Świsty wdechowe
- Świsty wydechowe
- Stridor
- Wydłużenie fazy wydechowej
- Skrzeczenia
- Tarcie opłucnowe
- Furczenia
- Uwagi

\*

### Pacjent 23

Wiek: 11 lat

Wzrost: 147 cm

Waga: 32 kg

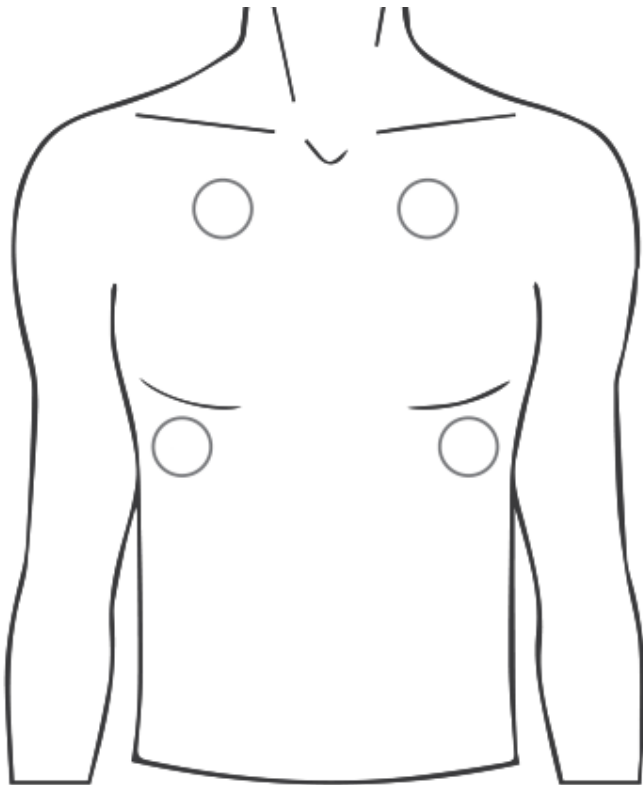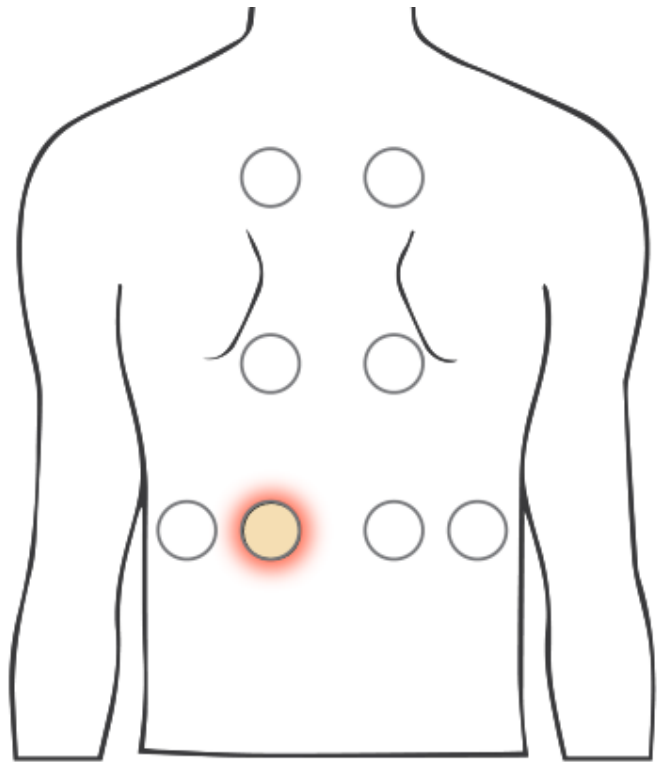

- Szmer pęcherzykowy prawidłowy
- Szmer pęcherzykowy ściszony
- Szmer pęcherzykowy zaostrowany
- Szmer oskrzelowy prawidłowy
- Szmer oskrzelowy patologiczny (w nieprawidłowym miejscu)
- Rzężenia drobnobańkowe
- Rzężenia średniobańkowe
- Rzężenia grubobańkowe
- Trzeszczenia
- Świsty wdechowe
- Świsty wydechowe
- Stridor
- Wydłużenie fazy wydechowej
- Skrzeczenia
- Tarcie opłucnowe
- Furczenia
- Uwagi

\*

## Pacjent 24

Wiek: 14 lat

Wzrost: 150 cm

Waga: 35 kg

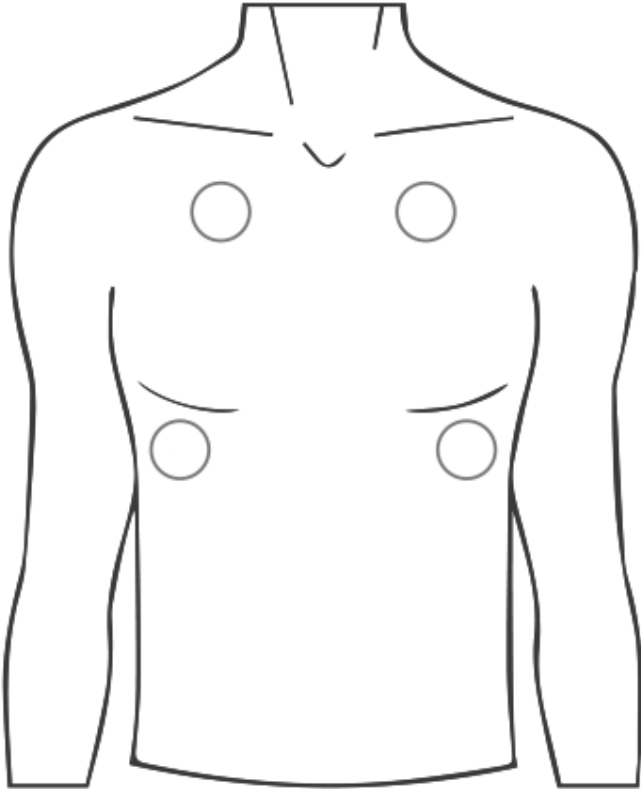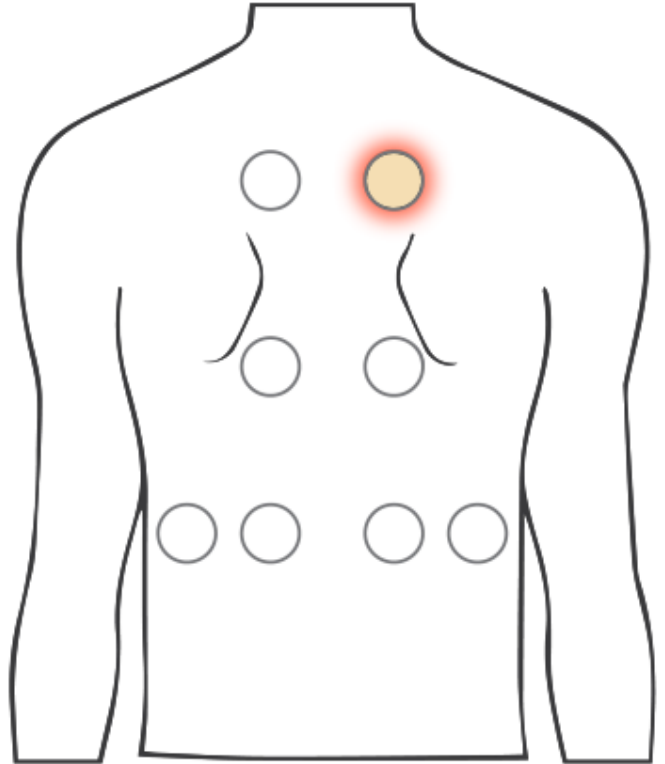

- Szmer pęcherzykowy prawidłowy
- Szmer pęcherzykowy ściszony
- Szmer pęcherzykowy zaostrowy
- Szmer oskrzelowy prawidłowy
- Szmer oskrzelowy patologiczny (w nieprawidłowym miejscu)
- Rzężenia drobnobańkowe
- Rzężenia średniobańkowe
- Rzężenia grubobańkowe
- Trzeszczenia
- Świsty wdechowe



- Świsty wydechowe
- Stridor
- Wydłużenie fazy wydechowej
- Skrzeczenia
- Tarcie opłucnowe
- Furczenia
- Uwagi

---

**\* Proszę zaznaczyć jakie słuchawki użył Pan/Pani do odsłuchania nagrań. Jeśli znana jest firma i model słuchawek, proszę wpisać w polu "model słuchawek"**

- słuchawki nauszne
- słuchawki douszne
- model słuchawek
