# Supplementary material for: The accuracy of lung auscultation in the practice of physicians and medical students
Source: PubMed Central journal article supplement (PMC6690530; doi:10.1371/journal.pone.0220606), 2019-08-12
Supplement: pone.0220606.s003.pdf [file pone.0220606.s003.pdf]

# Survey: Sounds of auscultation

Survey for doctors and medical students for the research about the auscultation of the respiratory system.

Please enter your e-mail. The field is not mandatory.

\* What is your specialization?

- pediatrics
- currently training to specialize in pediatrics
- neonatology
- currently training to specialize in neonatology
- pulmonology
- currently training to specialize in pulmonology
- internal medicine
- currently training to specialize in internal medicine
- family medicine
- currently training to specialize in family medicine
- cardiac surgery
- currently training to specialize in cardiac surgery
- anesthesiology and intensive care
- currently training to specialize in anesthesiology and intensive care
- medical student (enter your year in the "other" box)
- other

\* The year of graduation (if you are a student please enter your planned year of graduation).

\* University you graduated from (if you are a student, enter the name of the University where you are currently studying).

On a scale from 0 to 5 (where 0 = "very poorly" and 5 = "very well"), how do you evaluate your skills in respiratory system auscultation?

|            | 0                     | 1                     | 2                     | 3                     | 4                     | 5                     |
|------------|-----------------------|-----------------------|-----------------------|-----------------------|-----------------------|-----------------------|
| * a child  | <input type="radio"/> | <input type="radio"/> | <input type="radio"/> | <input type="radio"/> | <input type="radio"/> | <input type="radio"/> |
| * an adult | <input type="radio"/> | <input type="radio"/> | <input type="radio"/> | <input type="radio"/> | <input type="radio"/> | <input type="radio"/> |

Please indicate how much you agree with the following statements.

|                                                                                                                                          | strongly disagree     | do not agree          | partially agree       | agree                 | strongly agree        |
|------------------------------------------------------------------------------------------------------------------------------------------|-----------------------|-----------------------|-----------------------|-----------------------|-----------------------|
| * The number of hours during the studies dedicated to the auscultation of the respiratory system is INADEQUATE                           | <input type="radio"/> | <input type="radio"/> | <input type="radio"/> | <input type="radio"/> | <input type="radio"/> |
| * The number of hours dedicated to training in auscultation of the respiratory system during internship and specialization is INADEQUATE | <input type="radio"/> | <input type="radio"/> | <input type="radio"/> | <input type="radio"/> | <input type="radio"/> |
| * Additional training in auscultation of respiratory system for doctors in my specialization are needed                                  | <input type="radio"/> | <input type="radio"/> | <input type="radio"/> | <input type="radio"/> | <input type="radio"/> |
| * The names associated with the auscultatory sounds of the respiratory system are inconsistent and need to be organised                  | <input type="radio"/> | <input type="radio"/> | <input type="radio"/> | <input type="radio"/> | <input type="radio"/> |

**How often do you practice auscultation.**

|            | everyday              | few times per week    | at least once per week | at least once per month | fewer than once per month | I don't do auscultation |
|------------|-----------------------|-----------------------|------------------------|-------------------------|---------------------------|-------------------------|
| * a child  | <input type="radio"/> | <input type="radio"/> | <input type="radio"/>  | <input type="radio"/>   | <input type="radio"/>     | <input type="radio"/>   |
| * an adult | <input type="radio"/> | <input type="radio"/> | <input type="radio"/>  | <input type="radio"/>   | <input type="radio"/>     | <input type="radio"/>   |

**\* Do you have a musical background?**

- no
- music school
- choir
- other

**Do you use an electronic stethoscope in your work?**

- yes
- no

**\* During lungs auscultation, do you use:**

- the diaphragm of stethoscope
- the bell of stethoscope
- other (what kind?)

**Looking at the illustration below, please select the points where you usually auscultate a patient.**

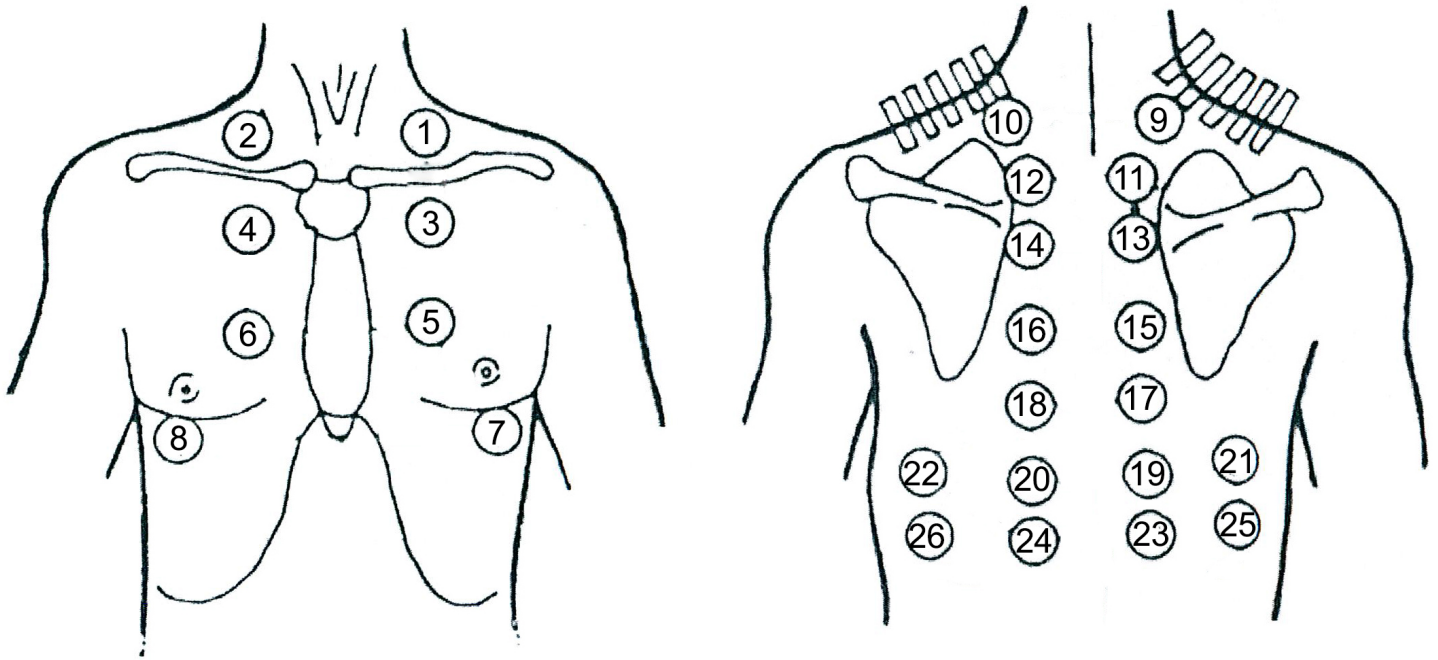

|            | 1                        | 2                        | 3                        | 4                        | 5                        | 6                        | 7                        | 8                        | 9                        | 10                       | 11                       | 12                       | 13                       | 14                       | 15                       | 16                       | 17                       | 18                       | 19                       | 20                       | 21                       | 22                       | 23                       | 24                       | 25                       | 26                       |
|------------|--------------------------|--------------------------|--------------------------|--------------------------|--------------------------|--------------------------|--------------------------|--------------------------|--------------------------|--------------------------|--------------------------|--------------------------|--------------------------|--------------------------|--------------------------|--------------------------|--------------------------|--------------------------|--------------------------|--------------------------|--------------------------|--------------------------|--------------------------|--------------------------|--------------------------|--------------------------|
| * a child  | <input type="checkbox"/> | <input type="checkbox"/> | <input type="checkbox"/> | <input type="checkbox"/> | <input type="checkbox"/> | <input type="checkbox"/> | <input type="checkbox"/> | <input type="checkbox"/> | <input type="checkbox"/> | <input type="checkbox"/> | <input type="checkbox"/> | <input type="checkbox"/> | <input type="checkbox"/> | <input type="checkbox"/> | <input type="checkbox"/> | <input type="checkbox"/> | <input type="checkbox"/> | <input type="checkbox"/> | <input type="checkbox"/> | <input type="checkbox"/> | <input type="checkbox"/> | <input type="checkbox"/> | <input type="checkbox"/> | <input type="checkbox"/> | <input type="checkbox"/> | <input type="checkbox"/> |
| * an adult | <input type="checkbox"/> | <input type="checkbox"/> | <input type="checkbox"/> | <input type="checkbox"/> | <input type="checkbox"/> | <input type="checkbox"/> | <input type="checkbox"/> | <input type="checkbox"/> | <input type="checkbox"/> | <input type="checkbox"/> | <input type="checkbox"/> | <input type="checkbox"/> | <input type="checkbox"/> | <input type="checkbox"/> | <input type="checkbox"/> | <input type="checkbox"/> | <input type="checkbox"/> | <input type="checkbox"/> | <input type="checkbox"/> | <input type="checkbox"/> | <input type="checkbox"/> | <input type="checkbox"/> | <input type="checkbox"/> | <input type="checkbox"/> | <input type="checkbox"/> | <input type="checkbox"/> |

**The research on auscultation of the respiratory system - practical part**

In this part auscultation recordings of 24 patients will be presented. Please use headphones to listen to the recordings.

For each patient the information includes age, height and weight of the patient.

The illustrations show where the stethoscope was placed and the sound recorded. Below are the recordings for you to listen to. Adjust the volume as needed. The recordings can be played repeatedly.

Please identify the respiratory sounds you can hear in each recording (multiple choice from two columns).

\*  
**Patient 1**

**Age: 11 years old**

**Height: 147 cm**

**Weight: 32 kg**

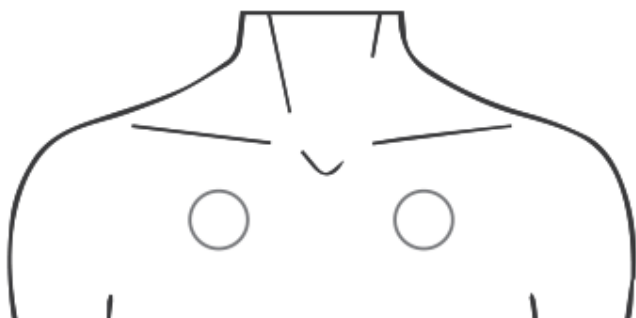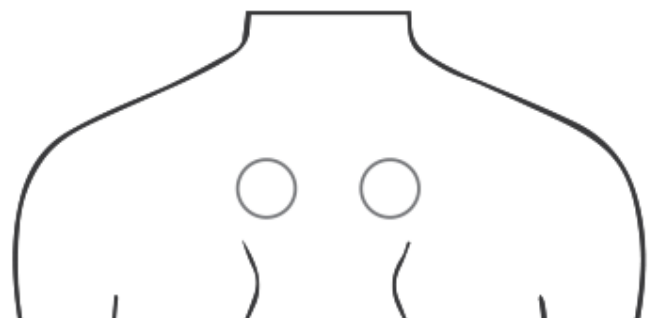

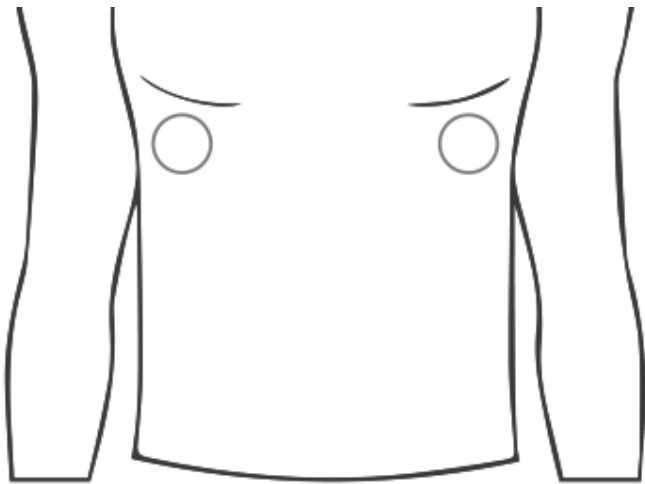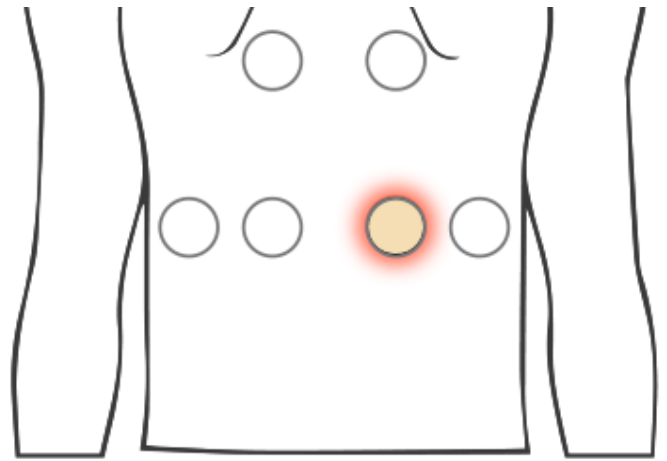

- vesicular breath sound
- louder breath sound
- abnormal bronchial sound
- medium crackles
- crepitus
- expiratory wheezes
- prolonged expiratory phase
- pleural rub
- comments

- diminished breath sound
- normal bronchial sound
- fine crackles
- coarse crackles
- inspiratory wheezes
- stridor
- squawk
- rhonchi

\*

**Patient 2**

**Age: 3 years old**

**Height: 96 cm**

**Weight: 12 kg**

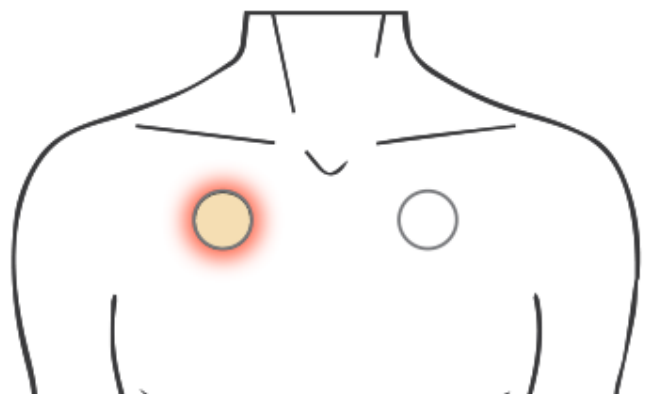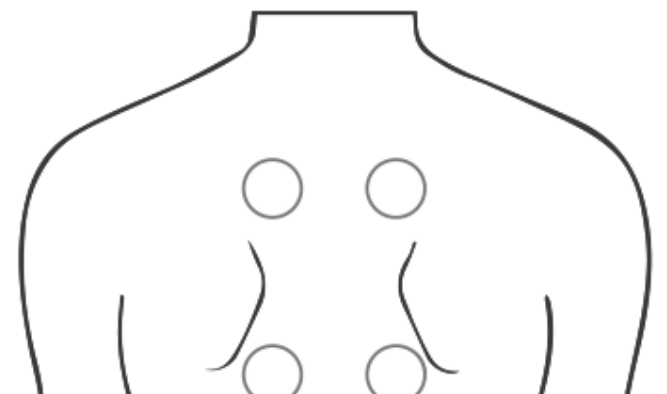

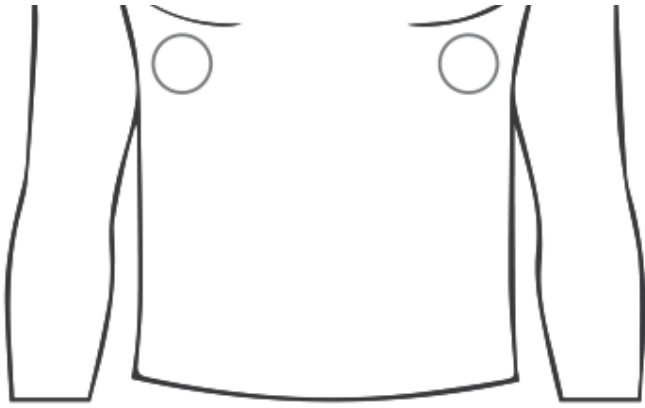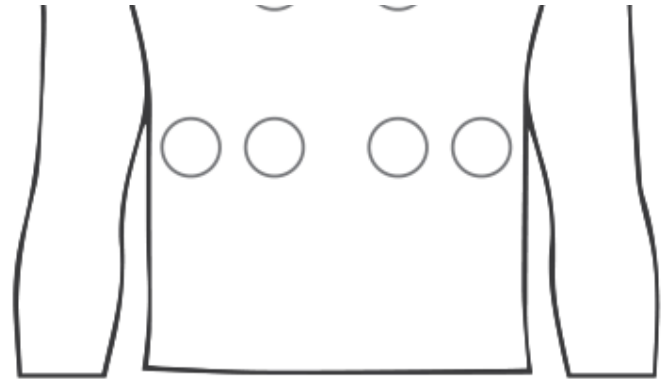

- vesicular breath sound
- louder breath sound
- abnormal bronchial sound
- medium crackles
- crepitus
- expiratory wheezes
- prolonged expiratory phase
- pleural rub
- comments

- diminished breath sound
- normal bronchial sound
- fine crackles
- coarse crackles
- inspiratory wheezes
- stridor
- squawk
- rhonchi

\*

### Patient 3

Age: 6 years old

Height: 118 cm

Weight: 30 kg

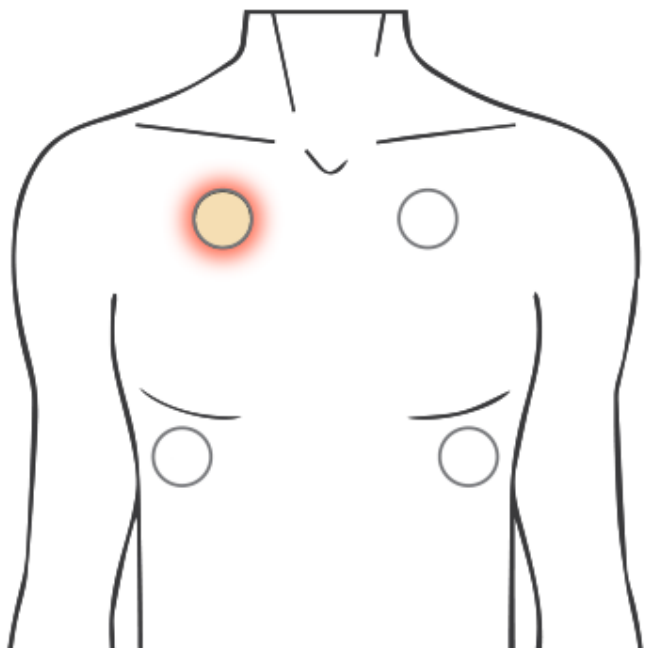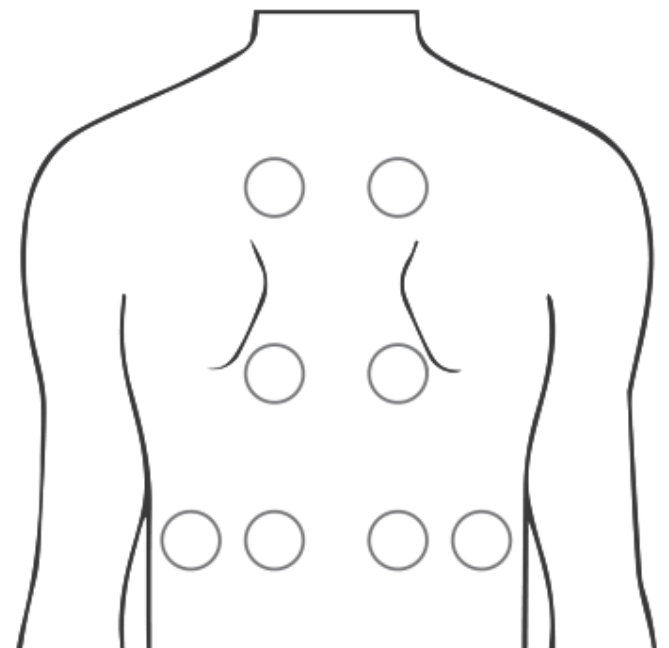

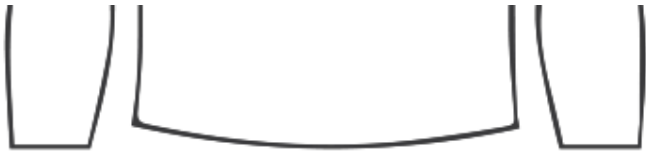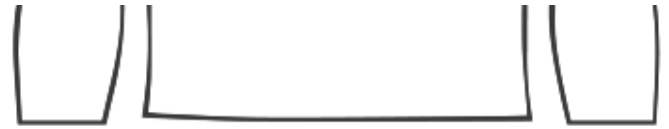

- vesicular breath sound
- louder breath sound
- abnormal bronchial sound
- medium crackles
- crepitus
- expiratory wheezes
- prolonged expiratory phase
- pleural rub
- comments

- diminished breath sound
- normal bronchial sound
- fine crackles
- coarse crackles
- inspiratory wheezes
- stridor
- squawk
- rhonchi

\*

#### Patient 4

Age: 7 years old

Height: 115 cm

Weight: 21 kg

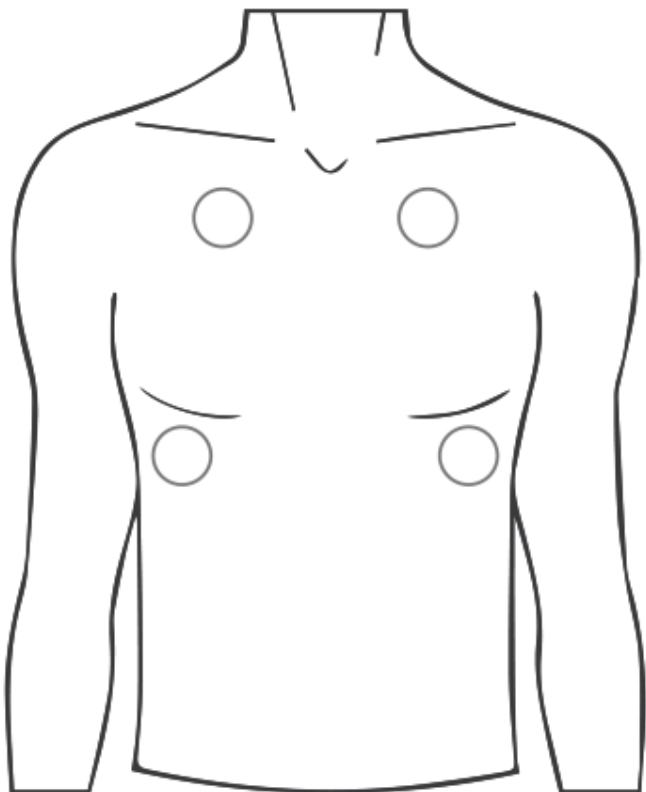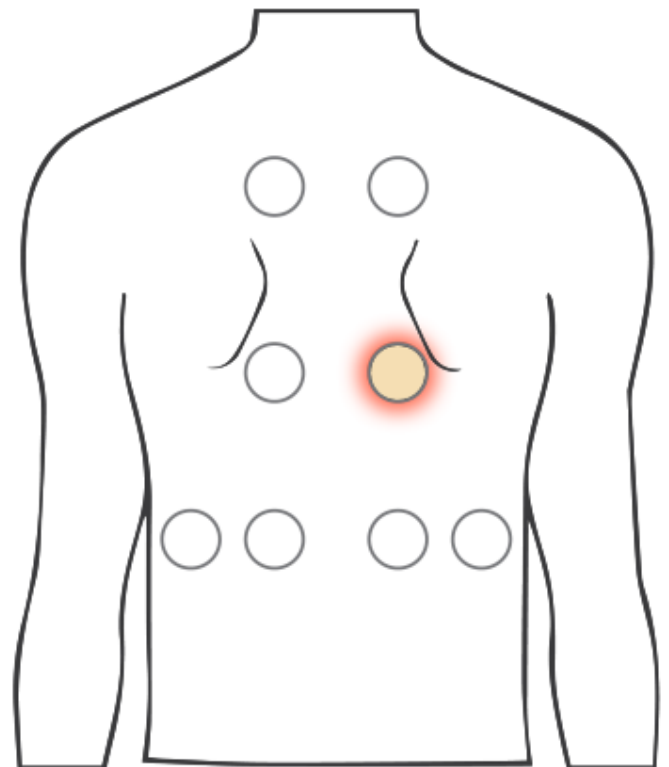

- vesicular breath sound
- louder breath sound
- abnormal bronchial sound
- medium crackles
- crepitus
- expiratory wheezes
- prolonged expiratory phase
- pleural rub
- comments

- diminished breath sound
- normal bronchial sound
- fine crackles
- coarse crackles
- inspiratory wheezes
- stridor
- squawk
- rhonchi

\*

**Patient 5**

**Age: 18 years old**

**Height: 168 cm**

**Weight: 50 kg**

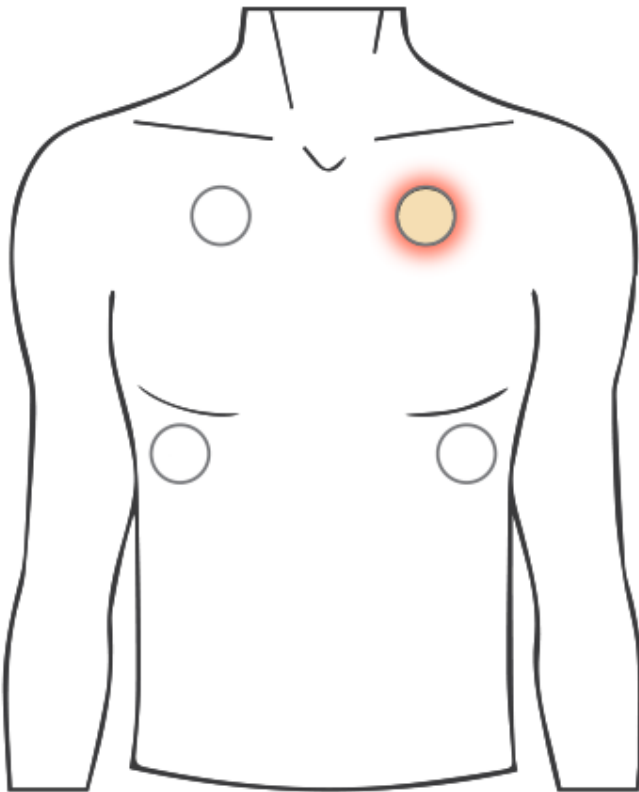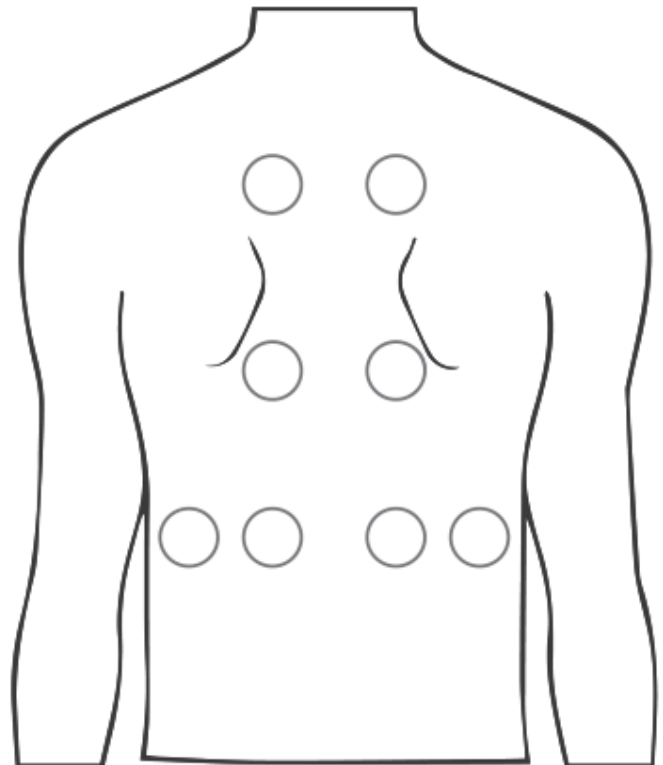

- vesicular breath sound
- louder breath sound
- abnormal bronchial sound
- medium crackles

- diminished breath sound
- normal bronchial sound
- fine crackles
- coarse crackles

- crepitus
- expiratory wheezes
- prolonged expiratory phase
- pleural rub
- comments

- inspiratory wheezes
- stridor
- squawk
- rhonchi

\*

### Patient 6

Age: 5 months old

Height: 78 cm

Weight: 7 kg

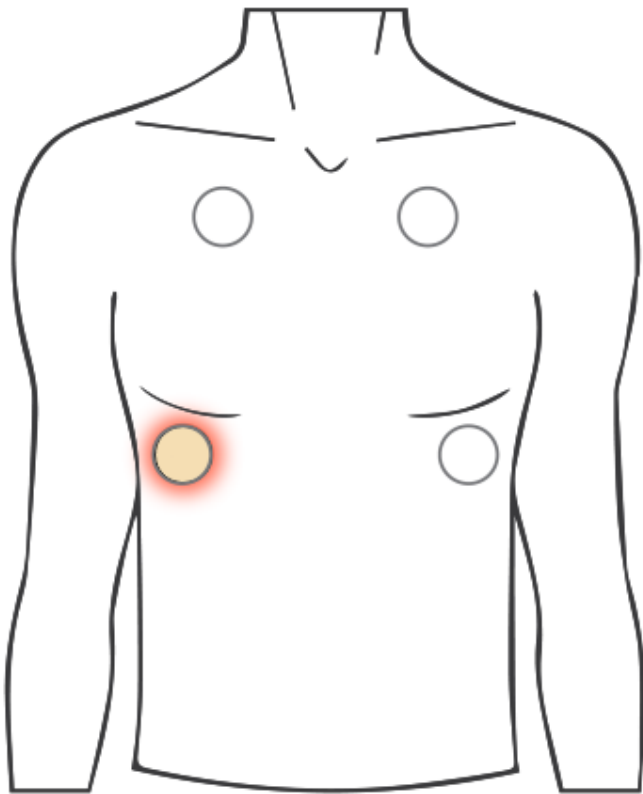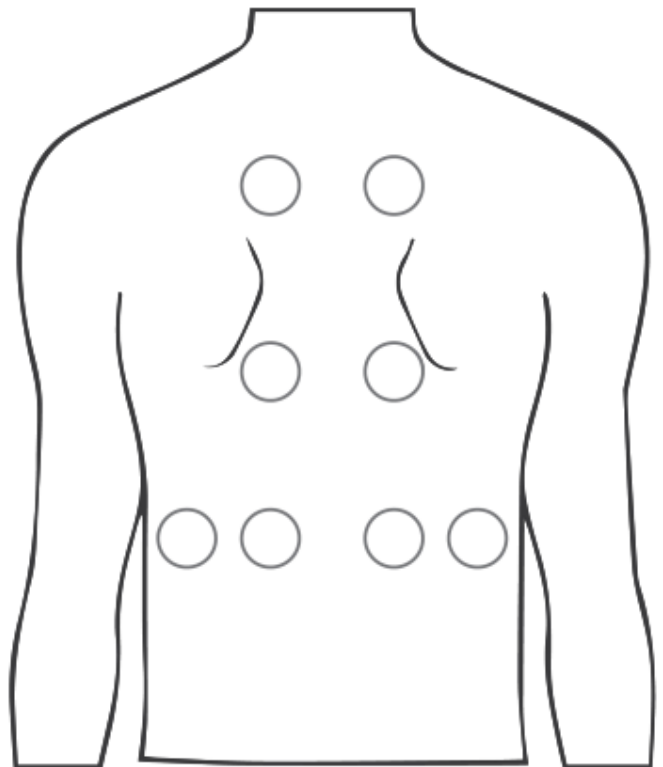

- vesicular breath sound
- louder breath sound
- abnormal bronchial sound
- medium crackles
- crepitus
- expiratory wheezes
- prolonged expiratory phase
- pleural rub

- diminished breath sound
- normal bronchial sound
- fine crackles
- coarse crackles
- inspiratory wheezes
- stridor
- squawk
- rhonchi



comments

\*

## Patient 7

Age: 2 years old

Height: 81 cm

Weight: 10 kg

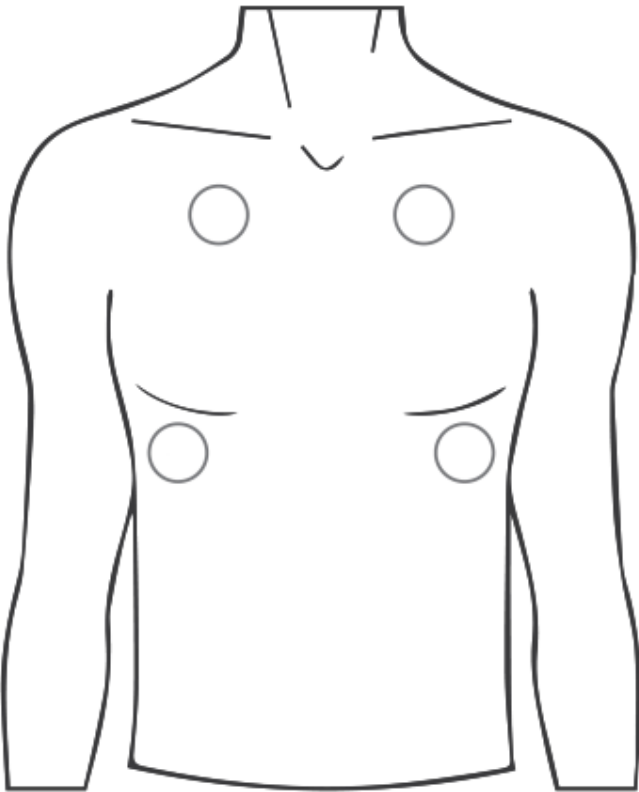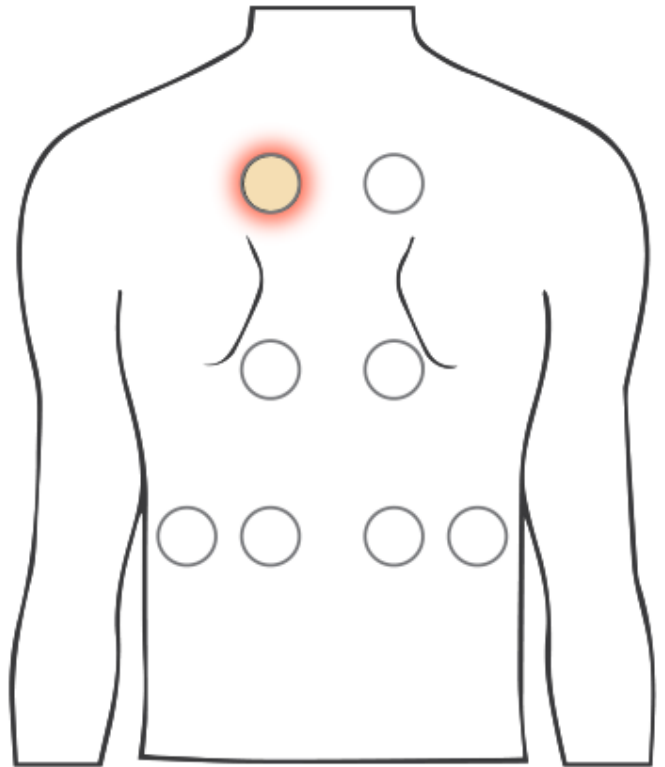

- vesicular breath sound
- louder breath sound
- abnormal bronchial sound
- medium crackles
- crepitus
- expiratory wheezes
- prolonged expiratory phase

- diminished breath sound
- normal bronchial sound
- fine crackles
- coarse crackles
- inspiratory wheezes
- stridor
- squawk

pleural rub

rhonchi

comments

\*

## Patient 8

Age: 18 years old

Height: 179 cm

Weight: 60 kg

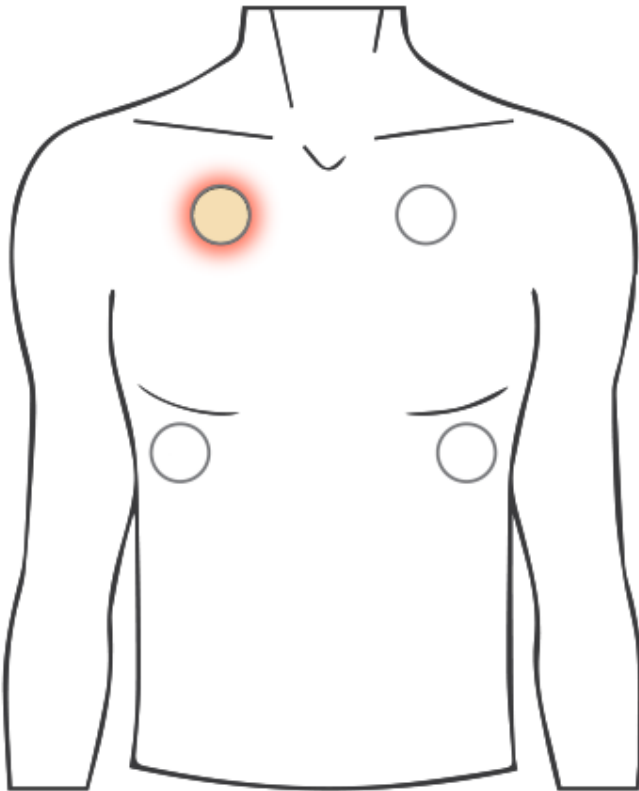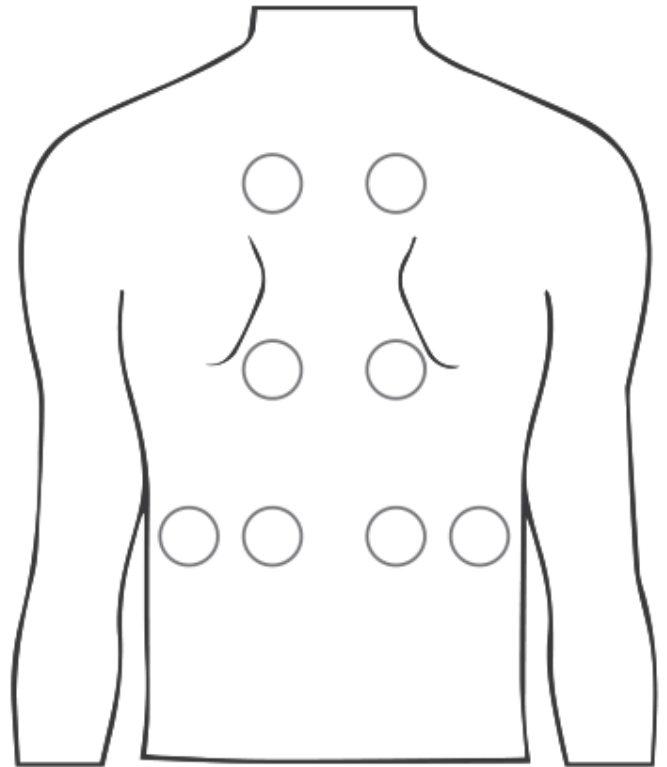

vesicular breath sound

diminished breath sound

louder breath sound

normal bronchial sound

abnormal bronchial sound

fine crackles

medium crackles

coarse crackles

crepitus

inspiratory wheezes

expiratory wheezes

stridor

prolonged expiratory phase

pleural rub

comments

squawk

rhonchi

\*

## Patient 9

Age: 15 years old

Height: 164 cm

Weight: 42 kg

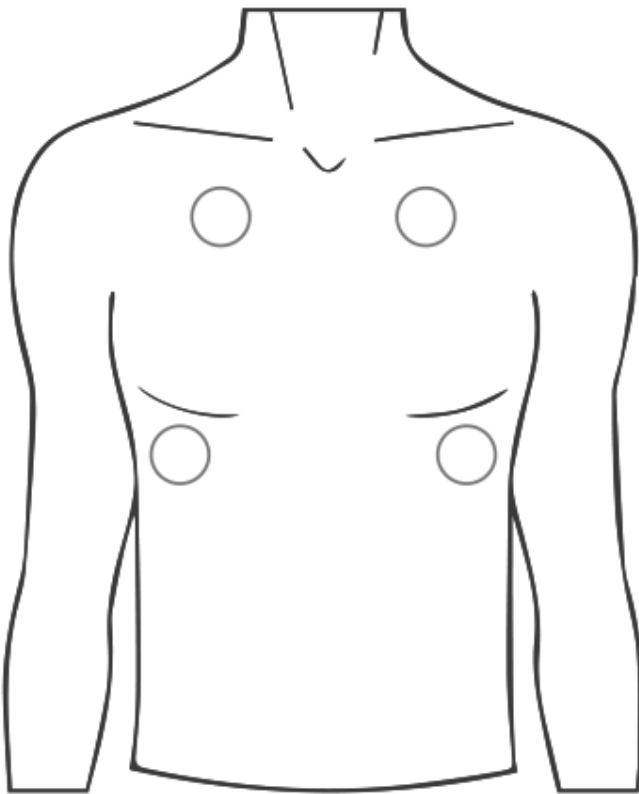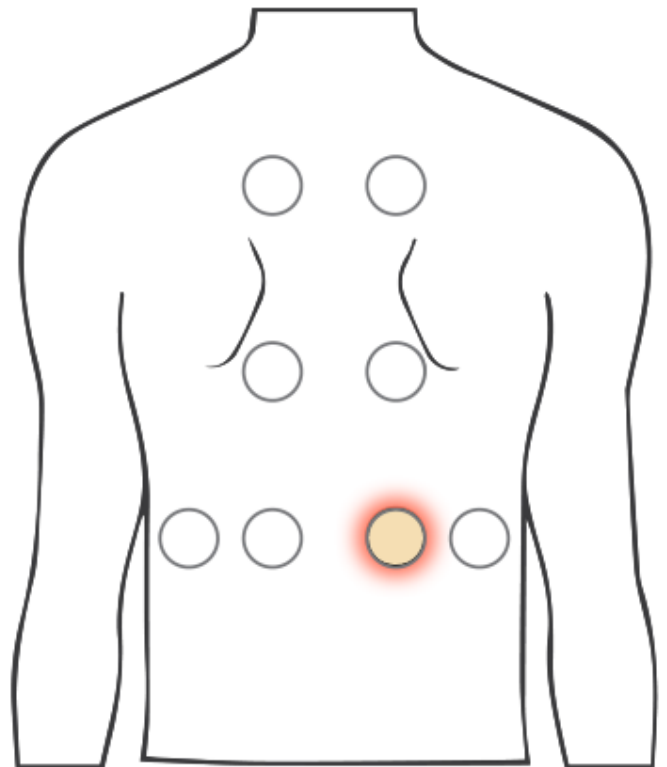

vesicular breath sound

louder breath sound

abnormal bronchial sound

medium crackles

crepitus

diminished breath sound

normal bronchial sound

fine crackles

coarse crackles

inspiratory wheezes

- expiratory wheezes
- prolonged expiratory phase
- pleural rub
- comments

- stridor
- squawk
- rhonchi

**\* Patient 10**

**Age: 3 years old**

**Height: 92 cm**

**Weight: 14 kg**

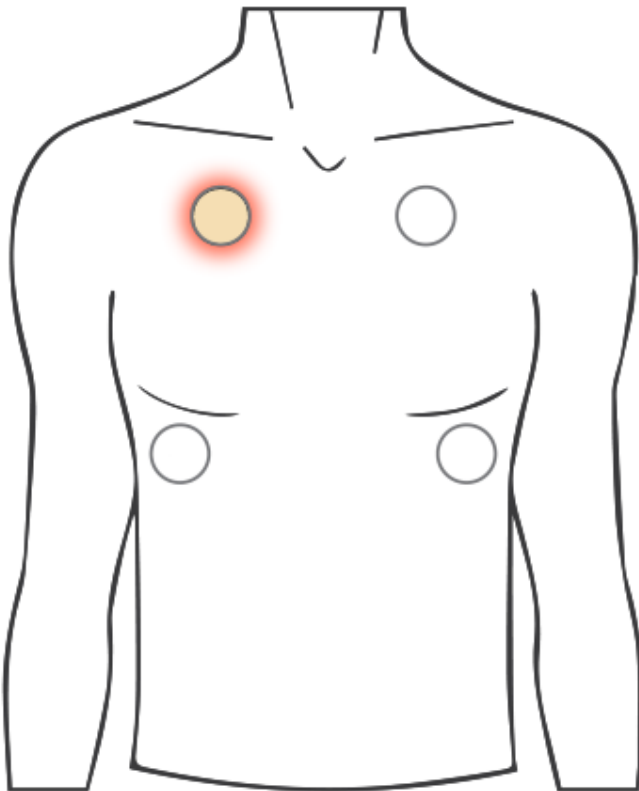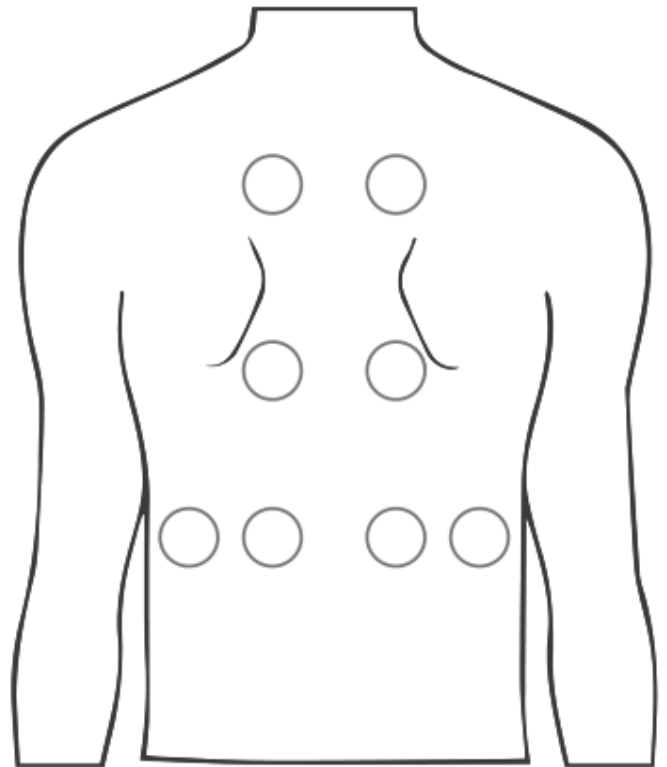

- vesicular breath sound
- louder breath sound
- abnormal bronchial sound
- medium crackles

- diminished breath sound
- normal bronchial sound
- fine crackles
- coarse crackles

- crepitus
- expiratory wheezes
- prolonged expiratory phase
- pleural rub
- comments

- inspiratory wheezes
- stridor
- squawk
- rhonchi

\*

**Patient 11**

**Age: 7 months old**

**Wzrost: 82 cm**

**Weight: 8 kg**

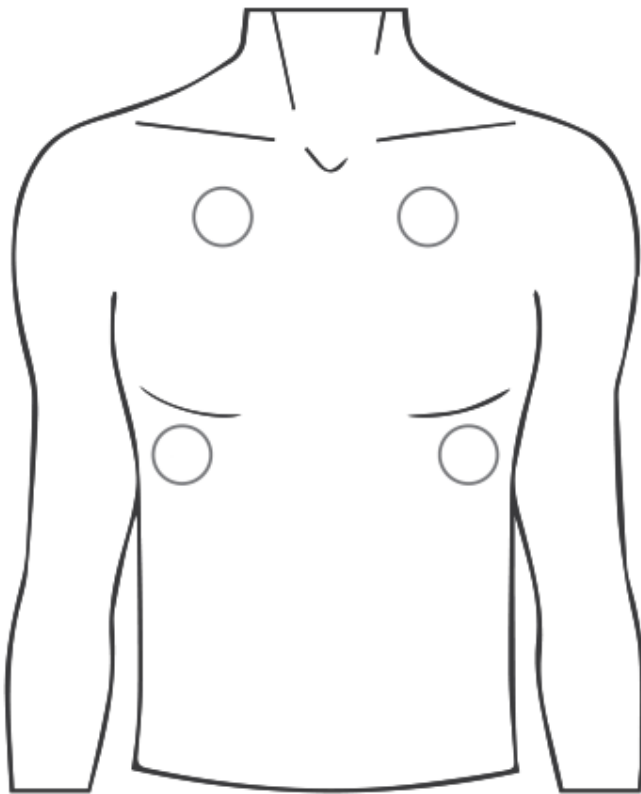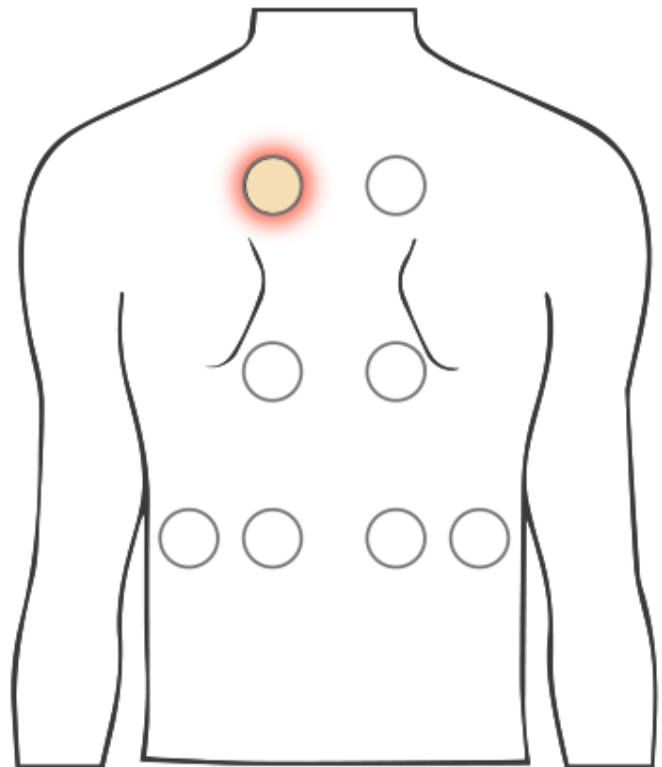

- vesicular breath sound
- louder breath sound
- abnormal bronchial sound
- medium crackles
- crepitus
- expiratory wheezes
- prolonged expiratory phase
- pleural rub

- diminished breath sound
- normal bronchial sound
- fine crackles
- coarse crackles
- inspiratory wheezes
- stridor
- squawk
- rhonchi

comments

\*

### Patient 12

Age: 17 years old

Height: 150 cm

Weight: 50 kg

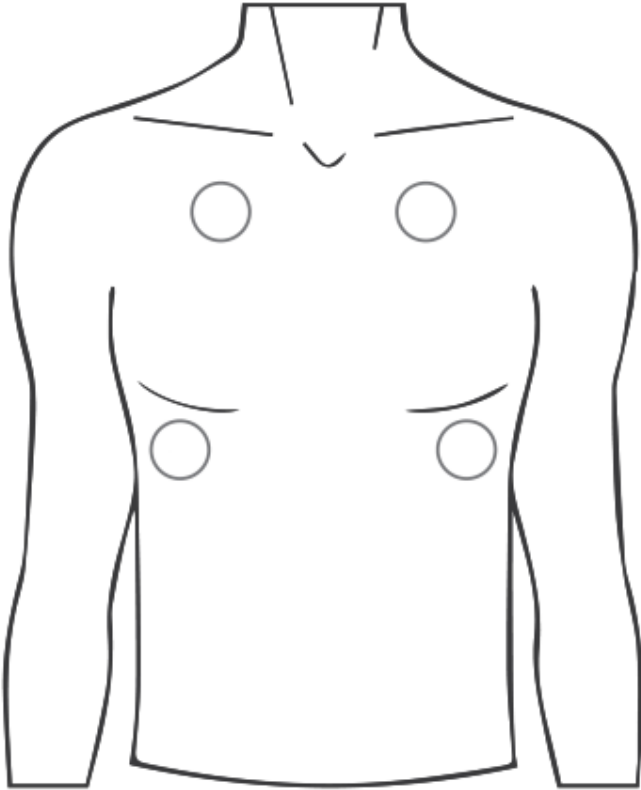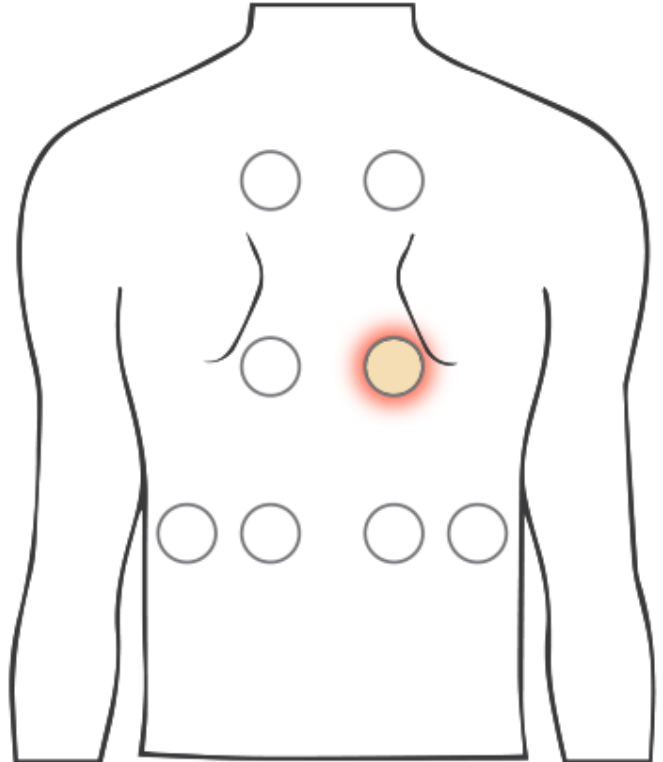

- vesicular breath sound
- louder breath sound
- abnormal bronchial sound
- medium crackles
- crepitus
- expiratory wheezes
- prolonged expiratory phase
- pleural rub
- comments

- diminished breath sound
- normal bronchial sound
- fine crackles
- coarse crackles
- inspiratory wheezes
- stridor
- squawk
- rhonchi

\*

### Patient 13

**Age: 13 years old**  
**Height: 148 cm**  
**Weight: 33 kg**

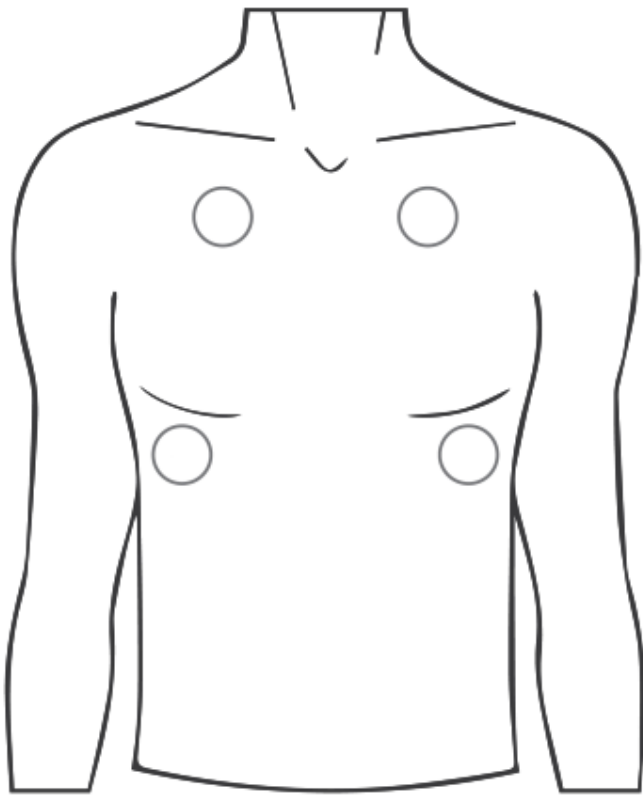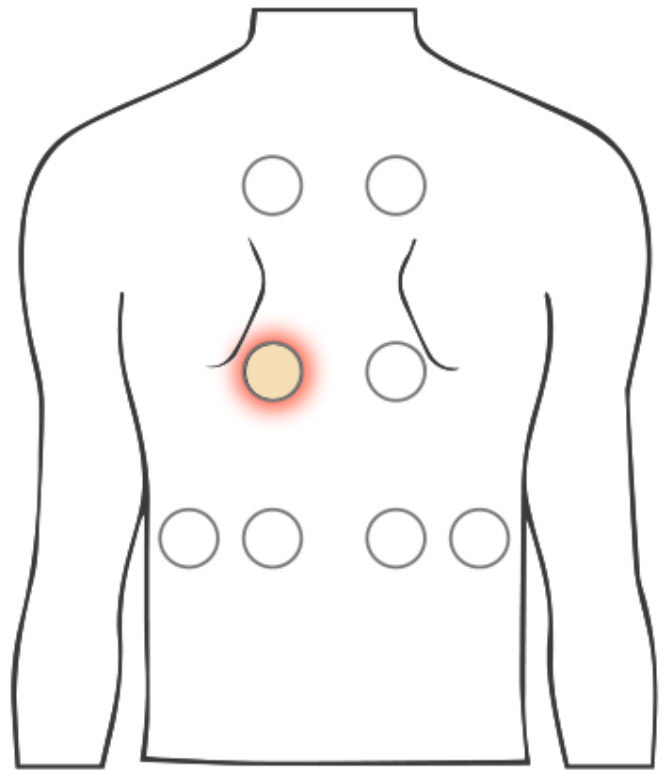

- vesicular breath sound
- louder breath sound
- abnormal bronchial sound
- medium crackles
- crepitus
- expiratory wheezes
- prolonged expiratory phase
- pleural rub
- comments

- diminished breath sound
- normal bronchial sound
- fine crackles
- coarse crackles
- inspiratory wheezes
- stridor
- squawk
- rhonchi

\*

**Patient 14**  
**Age: 14 years old**  
**Height: 150 cm**  
**Weight: 35 kg**

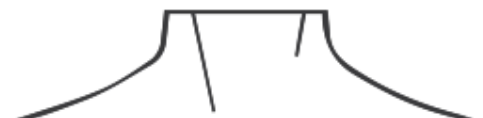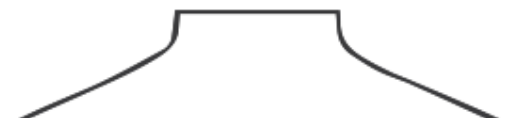

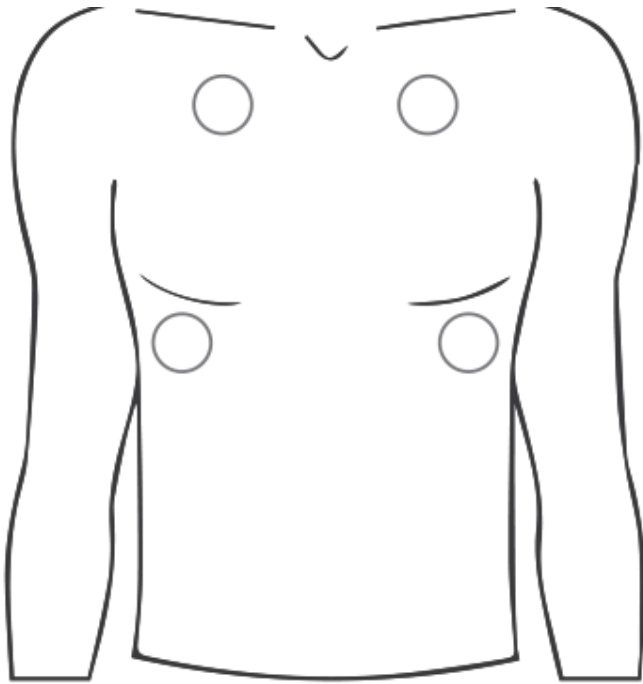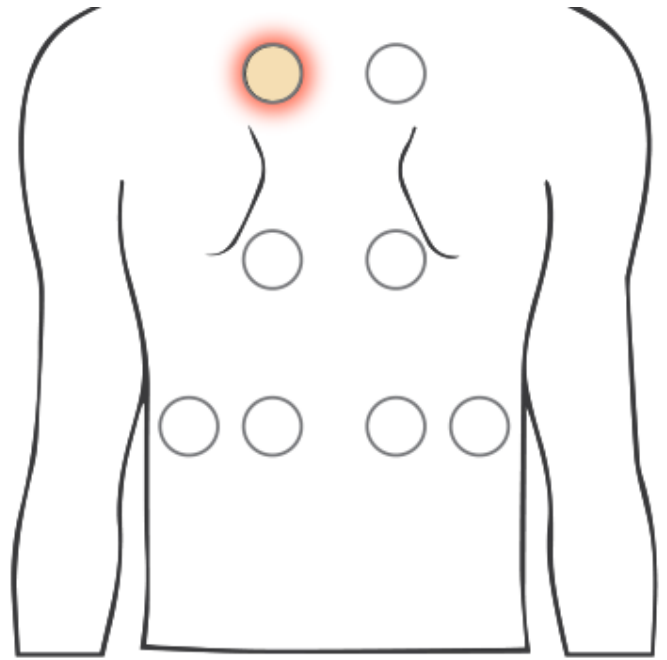

- vesicular breath sound
- louder breath sound
- abnormal bronchial sound
- medium crackles
- crepitus
- expiratory wheezes
- prolonged expiratory phase
- pleural rub
- comments

- diminished breath sound
- normal bronchial sound
- fine crackles
- coarse crackles
- inspiratory wheezes
- stridor
- squawk
- rhonchi

\*

**Patient 15**

**Age: 25 years old**

**Height: 176 cm**

**Weight: 58 kg**

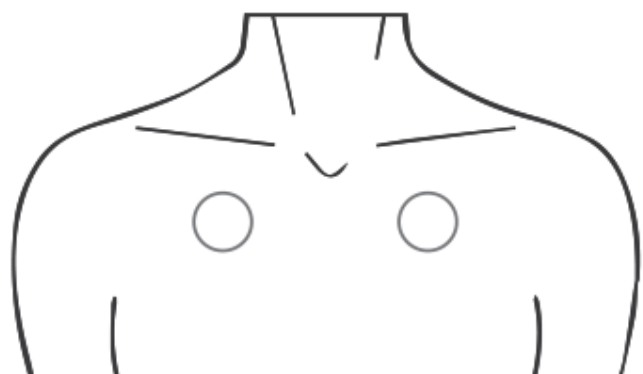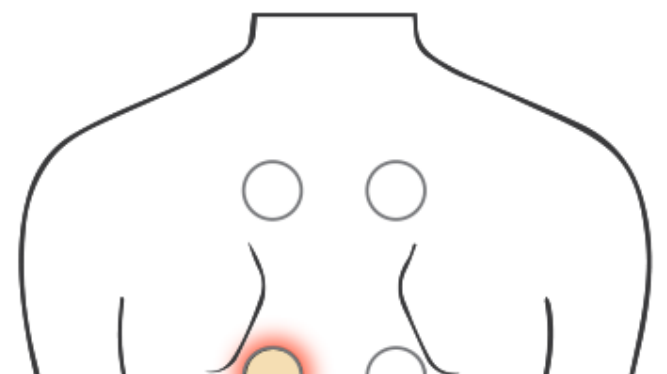



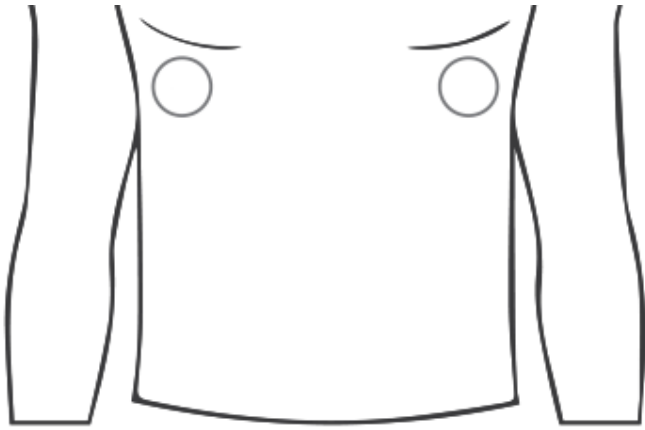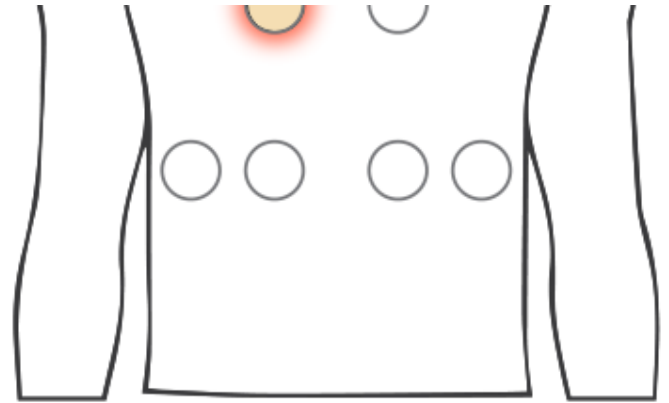

- vesicular breath sound
- louder breath sound
- abnormal bronchial sound
- medium crackles
- crepitus
- expiratory wheezes
- prolonged expiratory phase
- pleural rub
- comments

- diminished breath sound
- normal bronchial sound
- fine crackles
- coarse crackles
- inspiratory wheezes
- stridor
- squawk
- rhonchi

\*

**Patient 16**  
**Age: 3 years old**  
**Height: 94 cm**  
**Weight: 14 kg**

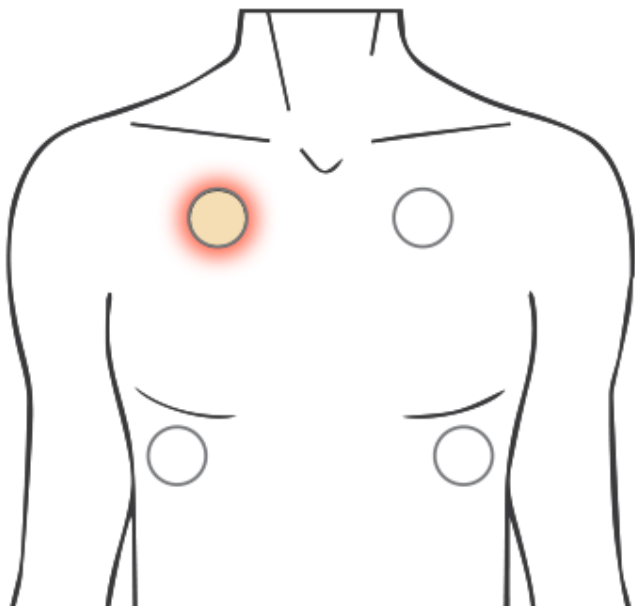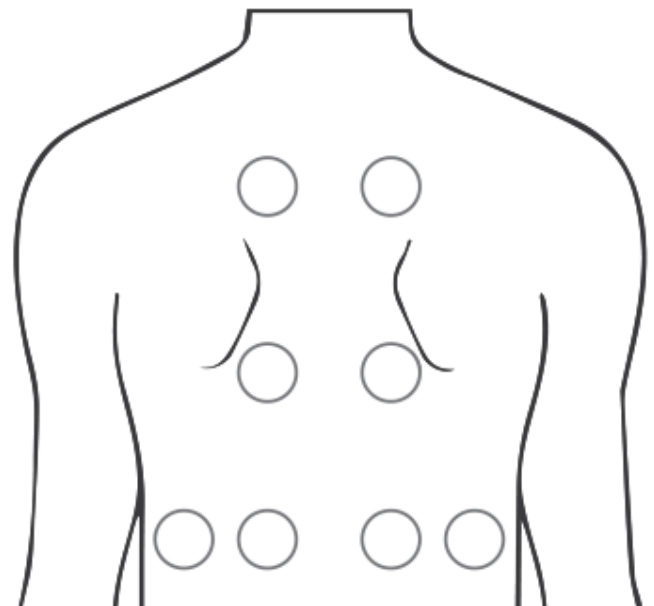

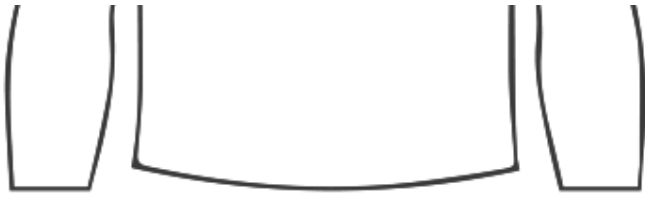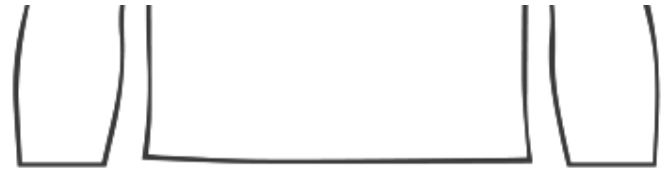

- vesicular breath sound
- louder breath sound
- abnormal bronchial sound
- medium crackles
- crepitus
- expiratory wheezes
- prolonged expiratory phase
- pleural rub
- comments

- diminished breath sound
- normal bronchial sound
- fine crackles
- coarse crackles
- inspiratory wheezes
- stridor
- squawk
- rhonchi

\*  
**Patient 17**  
**Age: 17 years old**  
**Height: 150 cm**  
**Weight: 50 kg**

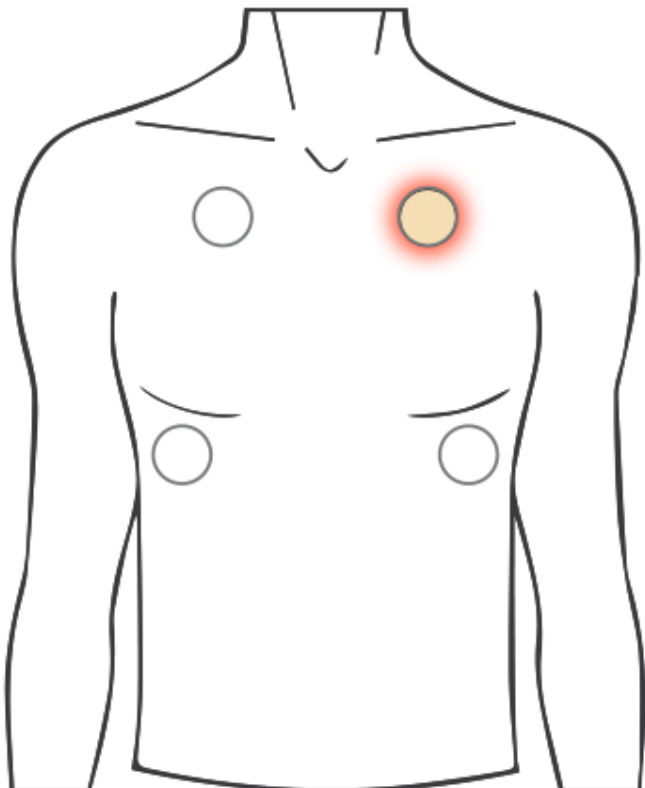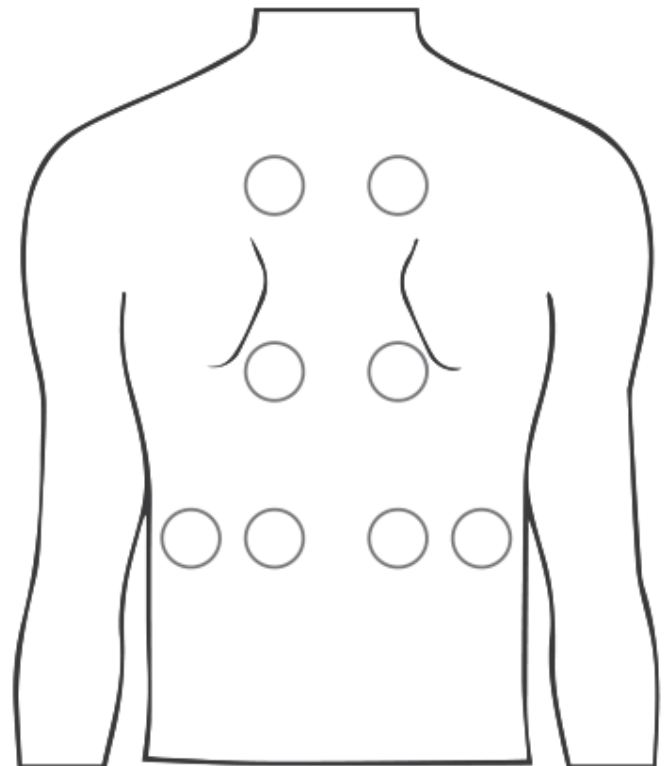

- vesicular breath sound
- louder breath sound
- abnormal bronchial sound
- medium crackles
- crepitus
- expiratory wheezes
- prolonged expiratory phase
- pleural rub
- comments

- diminished breath sound
- normal bronchial sound
- fine crackles
- coarse crackles
- inspiratory wheezes
- stridor
- squawk
- rhonchi

\*

**Patient 18**  
**Age: 18 years old**  
**Height: 179 cm**  
**Weight: 60 kg**

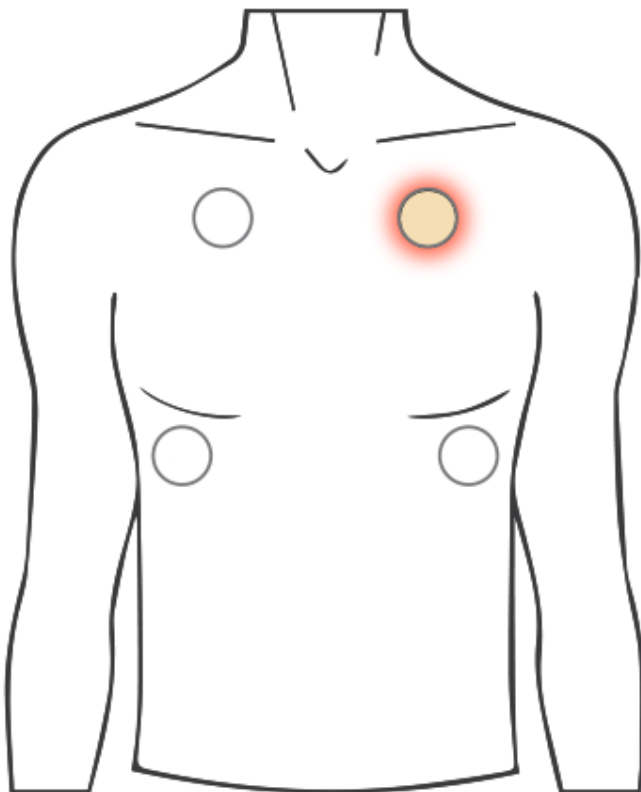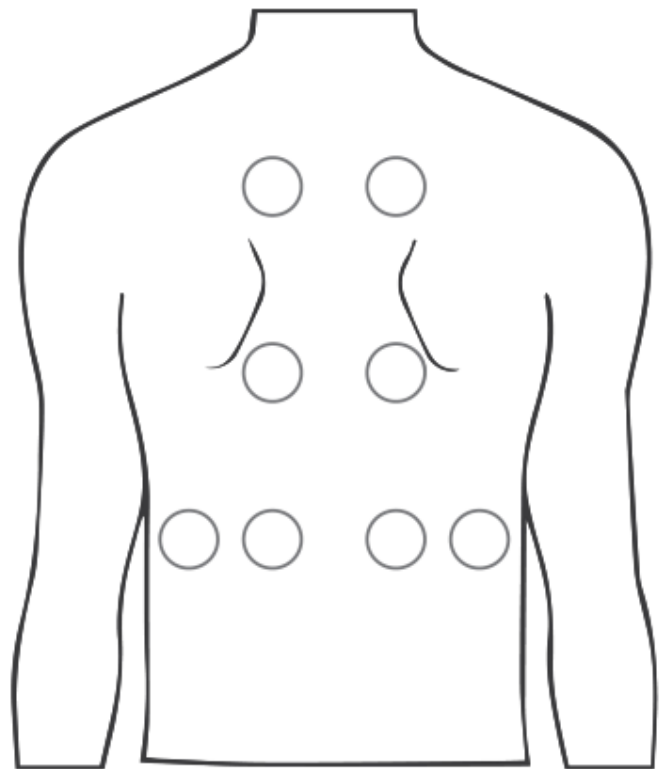

- vesicular breath sound
- louder breath sound
- abnormal bronchial sound
- medium crackles

- diminished breath sound
- normal bronchial sound
- fine crackles
- coarse crackles

- crepitus
- expiratory wheezes
- prolonged expiratory phase
- pleural rub
- comments

- inspiratory wheezes
- stridor
- squawk
- rhonchi

\*

**Patient 19**

**Age: 2 years old**

**Height: 84 cm**

**Weight: 11 kg**

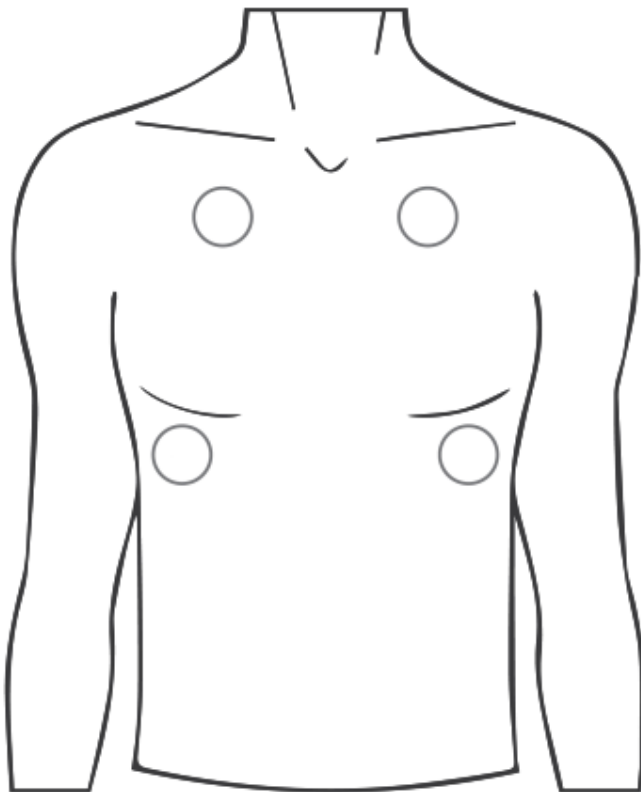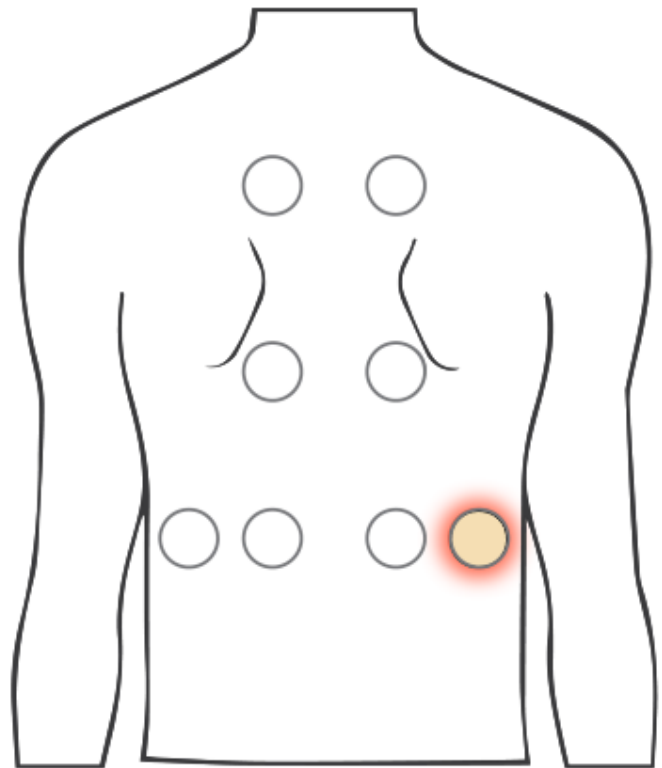

- vesicular breath sound
- louder breath sound
- abnormal bronchial sound

- diminished breath sound
- normal bronchial sound
- fine crackles

- medium crackles
- crepitus
- expiratory wheezes
- prolonged expiratory phase
- pleural rub
- comments

- coarse crackles
- inspiratory wheezes
- stridor
- squawk
- rhonchi

\*

**Patient 20**  
**Age: 6 years old**  
**Height: 118 cm**  
**Weight: 23 kg**

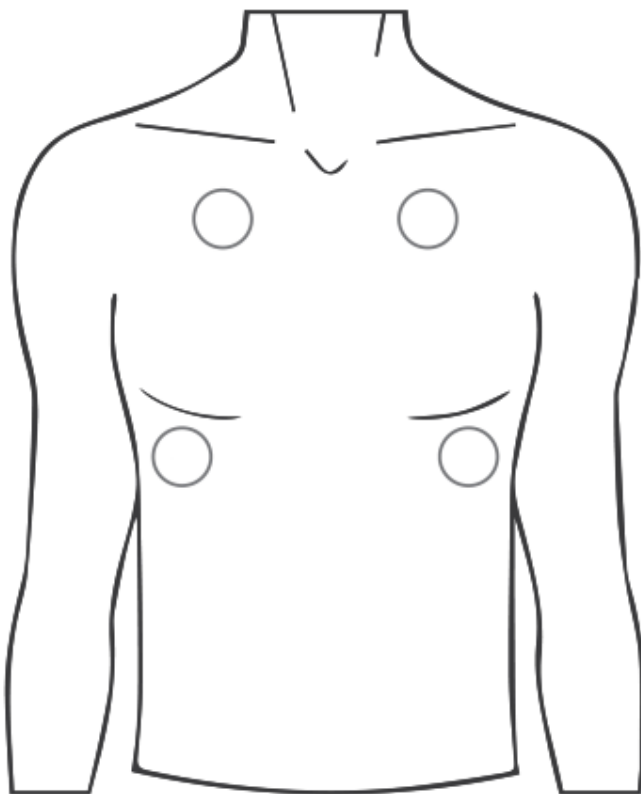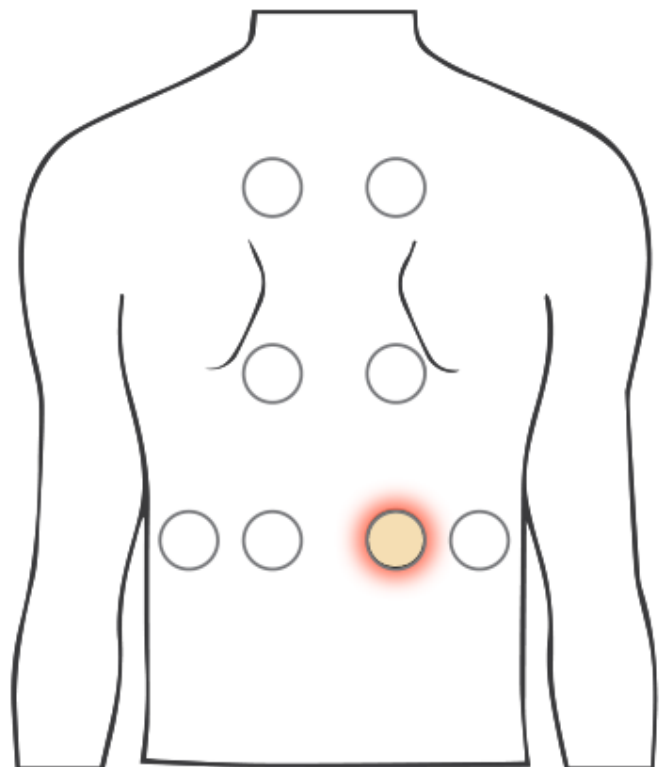

- vesicular breath sound
- louder breath sound
- abnormal bronchial sound
- medium crackles
- crepitus
- expiratory wheezes
- prolonged expiratory phase

- diminished breath sound
- normal bronchial sound
- fine crackles
- coarse crackles
- inspiratory wheezes
- stridor
- squawk

pleural rub

rhonchi

comments

\*

### Patient 21

Age: 35 years old

Height: 180 cm

Weight: 74 kg

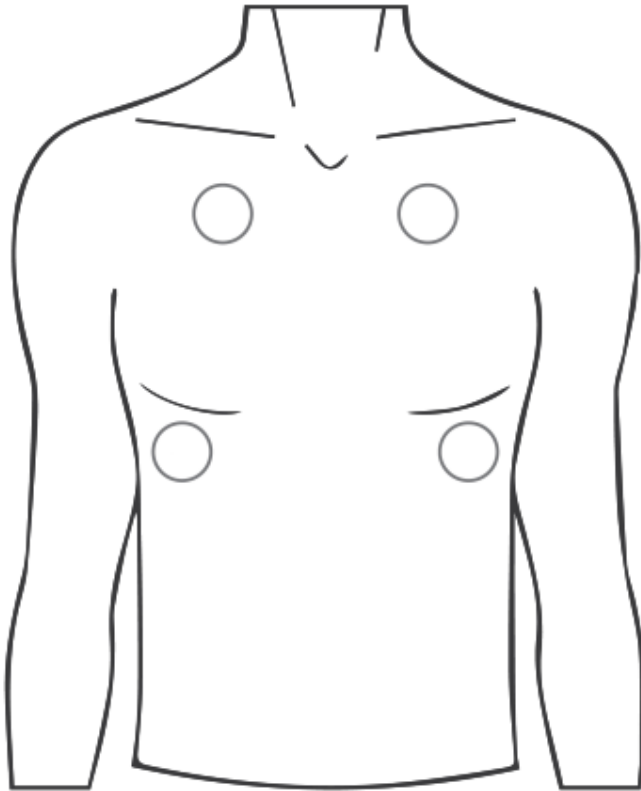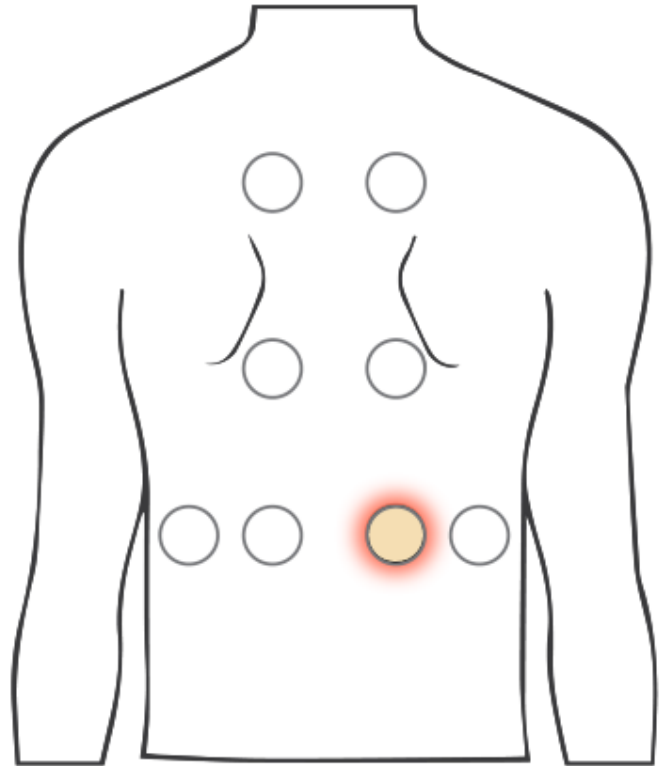

vesicular breath sound

diminished breath sound

louder breath sound

normal bronchial sound

abnormal bronchial sound

fine crackles

medium crackles

coarse crackles

crepitus

inspiratory wheezes

expiratory wheezes

stridor

prolonged expiratory phase

squawk

pleural rub

rhonchi

comments

\*

**Patient 22**

Age: 56 years old

Height: 162 cm

Weight: 53 kg

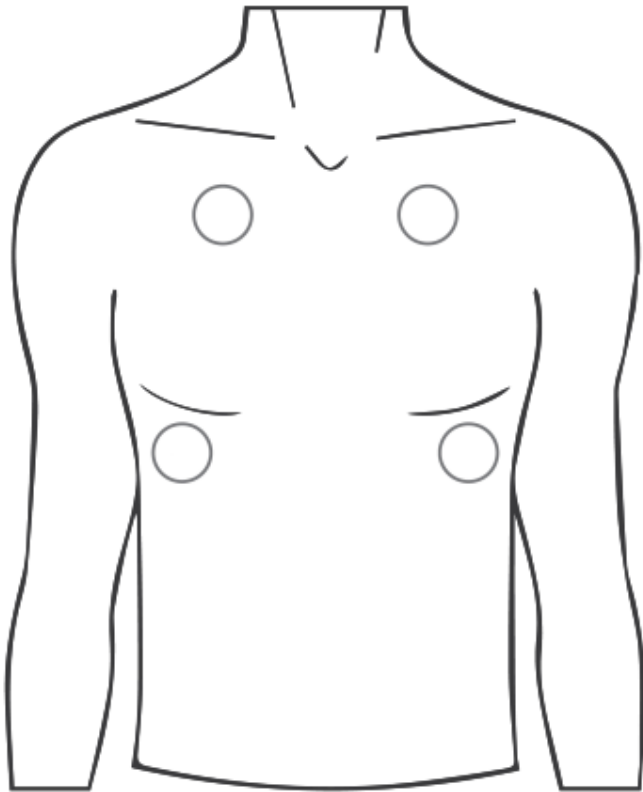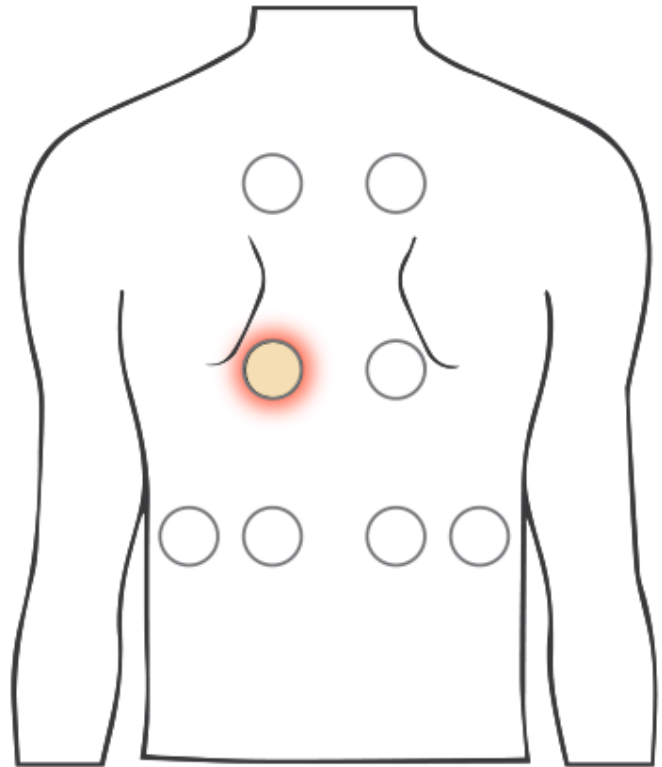

- vesicular breath sound
- louder breath sound
- abnormal bronchial sound
- medium crackles
- crepitus
- expiratory wheezes
- prolonged expiratory phase
- pleural rub
- comments

- diminished breath sound
- normal bronchial sound
- fine crackles
- coarse crackles
- inspiratory wheezes
- stridor
- squawk
- rhonchi

\*

**Patient 23**

Age: 11 years old

Height: 147 cm

Weight: 32 kg

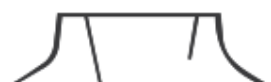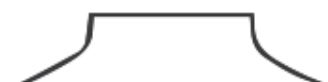

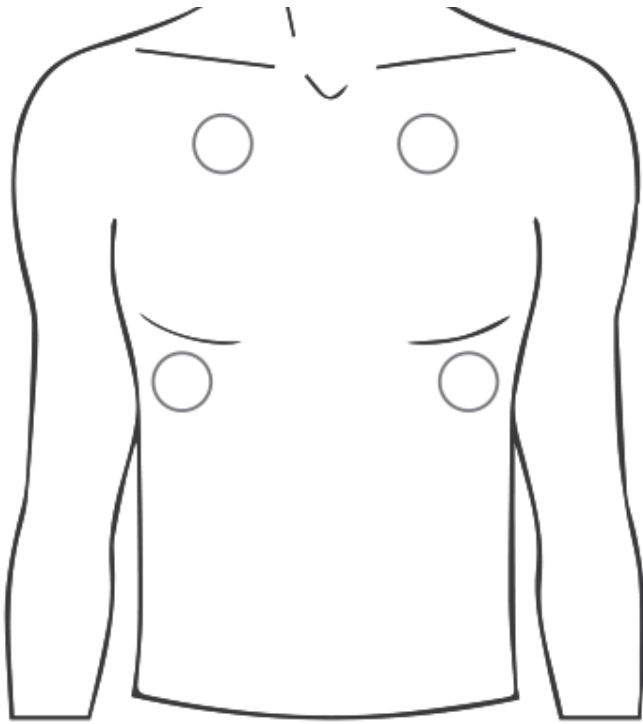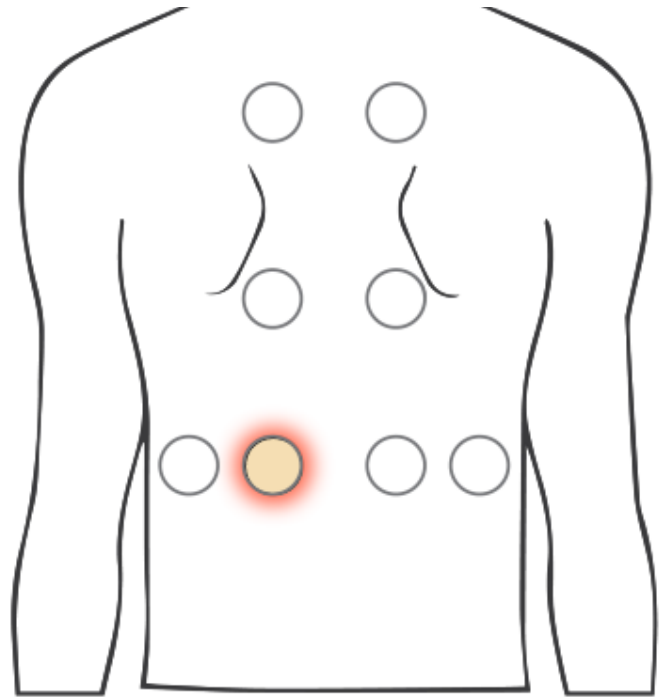

- vesicular breath sound
- louder breath sound
- abnormal bronchial sound
- medium crackles
- crepitus
- expiratory wheezes
- prolonged expiratory phase
- pleural rub
- comments

- diminished breath sound
- normal bronchial sound
- fine crackles
- coarse crackles
- inspiratory wheezes
- stridor
- squawk
- rhonchi

\*

### Patient 24

Age: 14 years old

Height: 150 cm

Weight: 35 kg

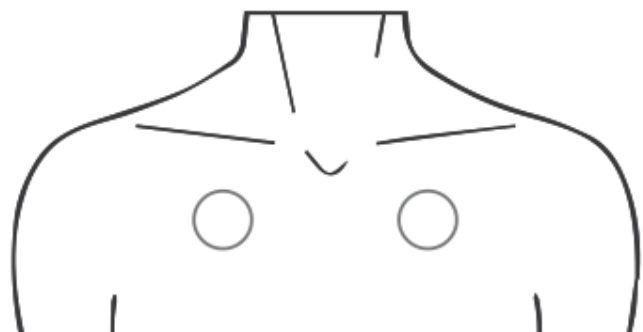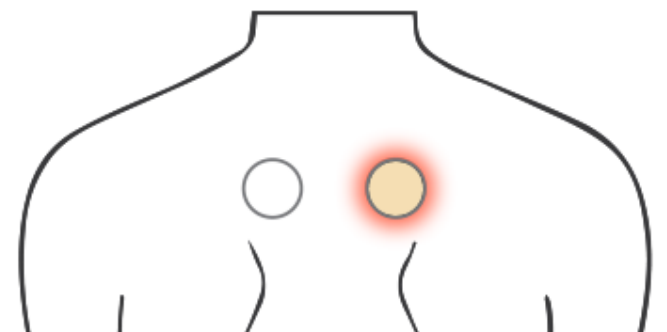



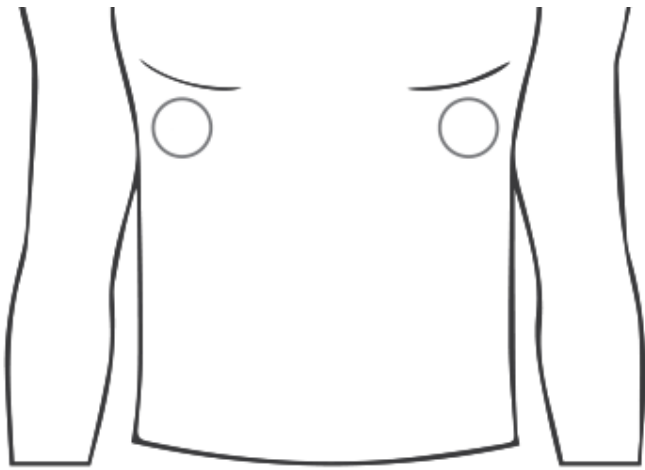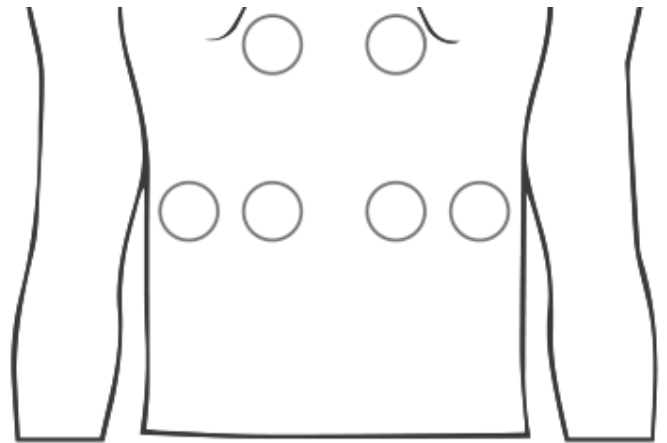

- vesicular breath sound
- louder breath sound
- abnormal bronchial sound
- medium crackles
- crepitus
- expiratory wheezes
- prolonged expiratory phase
- pleural rub
- comments

- diminished breath sound
- normal bronchial sound
- fine crackles
- coarse crackles
- inspiratory wheezes
- stridor
- squawk
- rhonchi

**\* What kind of headphones do you use to listen to the recordings? If you know the name of the headphones company, please enter in the box**

- Over-Ear Headphones
- In-Ear Headphones
- Name of the headphones company
